# Supplementary material for: A convenient access to β-iodo sulfone by the iodine-mediated iodosulfonylation of alkenes
Source: Royal Society of Chemistry journal article supplement (doi:10.1039/c5ra07065a), 2015-01-01

## Supporting Information

### Table of Contents

|                                                                                              |             |
|----------------------------------------------------------------------------------------------|-------------|
| <b>I. General remarks .....</b>                                                              | <b>1</b>    |
| <b>II. General procedure for the preparation of 3 and 6.....</b>                             | <b>1</b>    |
| <b>III. Analytical data of products obtained in this study.....</b>                          | <b>2-7</b>  |
| <b>IV. <sup>1</sup>H NMR and <sup>13</sup>C NMR spectra copies of compounds 3 and 6.....</b> | <b>8-30</b> |

### I. General Remarks:

Unless otherwise stated, all commercial reagents and solvents were used without additional purification. All the reactions were carried out under air atmosphere.  $^1\text{H}$  NMR spectra were recorded at 25 °C on a Bruker Ascend™ 400 spectrometer (Germany),  $^{13}\text{C}$  NMR spectra were recorded at 25 °C on a Bruker 100 MHz, and TMS as internal standard. Melting points were obtained with a micro melting point XT4A Beijing Keyi electrooptic apparatus and are uncorrected. HRMS data were obtained on a Waters LCT Premierxe™ (USA). All reactions were monitored by TLC with Taizhou GF254 silica gel coated plates. Flash column chromatography was carried out using 300-400 mesh silica gel at increased pressure.

### II. General procedure for the preparation of 3 and 6 (1a as an example).

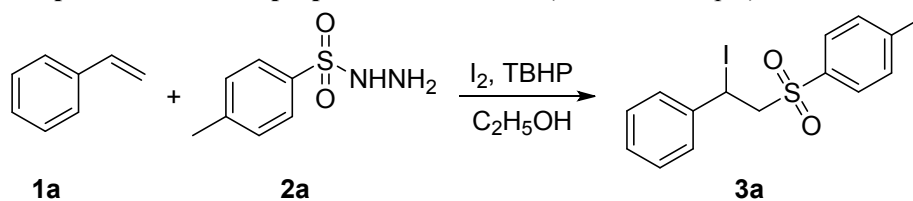

Styrene **1a** (52.0 mg, 0.5 mmol), 4-methylbenzenesulfonylhydrazide **2a** (102.3 mg, 0.55 mmol), I<sub>2</sub> (63.5 mg, 0.25 mmol) and TBHP (46.0 mg, 1.0 mmol) were added to EtOH (2 mL). The mixture was stirred at 0-20 °C for 8.0 h (monitored by TLC), quenched with water (10 mL), extracted with dichloromethane (5×3 mL), and dried over anhydrous Na<sub>2</sub>SO<sub>4</sub>. The solvent was removed under reduced pressure, and the residue was purified by a shot flash silica gel column chromatography (EtOAc/petro ether = 1 : 6) to give compound **3a** as a white solid (171.8 mg, 89%).

### III. Analytical data of products obtained in this study

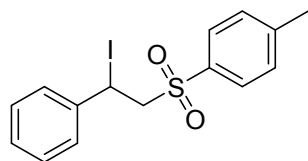

#### 1-((2-iodo-2-phenylethyl)sulfonyl)-4-methylbenzene **3a**

White solid. Mp: 103-104 °C; <sup>1</sup>H NMR (400 MHz; CDCl<sub>3</sub>): δ = 2.36 (s, 3H), 4.08 (dd, *J*<sub>1</sub> = 4.4, *J*<sub>2</sub> = 14.4, 1H), 4.33 (dd, *J*<sub>1</sub> = 4.4, *J*<sub>2</sub> = 14.4, 1H), 5.57 (dd, *J*<sub>1</sub> = 4.4, *J*<sub>2</sub> = 14.4, 1H), 7.10-7.16 (m, 5H), 7.21-7.24 (m, 2H), 7.44 (d, *J* = 8.0, 2H). <sup>13</sup>C NMR (100 MHz; CDCl<sub>3</sub>): δ = 18.2, 21.6, 65.9, 127.2, 128.0, 128.5, 128.7, 129.7, 136.1, 140.6, 144.7. HRMS (ESI-TOF) Calcd for C<sub>15</sub>H<sub>16</sub>IO<sub>2</sub>S, [M+H]<sup>+</sup> 386.9916; Found 386.9912.

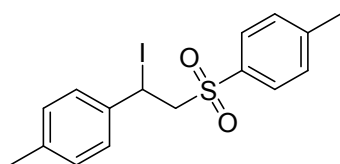

#### 1-((2-iodo-2-(*p*-tolyl)ethyl)sulfonyl)-4-methylbenzene **3b**

White solid. Mp: 134-135 °C; <sup>1</sup>H NMR (400 MHz; CDCl<sub>3</sub>): δ = 2.26 (s, 3H), 2.39 (s, 3H), 4.04 (dd, *J*<sub>1</sub> = 4.0, *J*<sub>2</sub> = 14.4, 1H), 4.30 (dd, *J*<sub>1</sub> = 4.4, *J*<sub>2</sub> = 14.4, 1H), 5.56 (dd, *J*<sub>1</sub> = 4.4, *J*<sub>2</sub> = 14.6, 1H), 6.92 (d, *J* = 7.6, 2H), 7.13 (t, *J* = 7.6, 4H), 7.44 (d, *J* = 8.4, 2H). <sup>13</sup>C NMR (100 MHz; CDCl<sub>3</sub>): δ = 18.7, 21.2, 21.6, 66.0, 127.0, 128.0, 129.4, 129.6, 136.2, 137.6, 138.6, 144.6. HRMS (ESI-TOF) Calcd for C<sub>16</sub>H<sub>18</sub>IO<sub>2</sub>S, [M+H]<sup>+</sup> 401.0072; Found 401.0067.

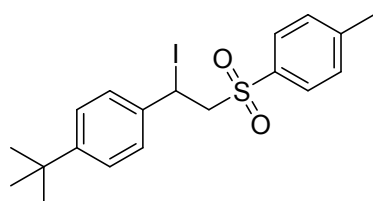

#### 1-(*tert*-butyl)-4-(1-iodo-2-tosylethyl)benzene **3c**

White solid. Mp: 125-126 °C; <sup>1</sup>H NMR (400 MHz; CDCl<sub>3</sub>): δ = 1.27 (s, 9H), 2.35 (s, 3H), 4.08 (dd, *J*<sub>1</sub> = 4.0, *J*<sub>2</sub> = 14.8, 1H), 4.35 (dd, *J*<sub>1</sub> = 4.4, *J*<sub>2</sub> = 14.4, 1H), 5.61 (dd, *J*<sub>1</sub> = 4.4, *J*<sub>2</sub> = 14.4, 1H), 7.07-7.13 (m, 6H), 7.39 (d, *J* = 8.0, 2H). <sup>13</sup>C NMR (100 MHz; CDCl<sub>3</sub>): δ = 18.7, 21.6, 31.2, 34.6, 66.0, 125.6, 126.8, 127.9, 129.5, 136.3, 137.3, 144.2, 151.7. HRMS (ESI-TOF) Calcd for C<sub>19</sub>H<sub>24</sub>IO<sub>2</sub>S, [M+H]<sup>+</sup> 443.0538; Found 443.0542.

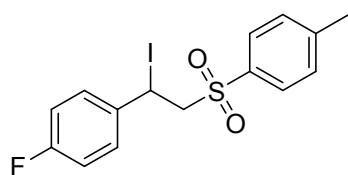

#### 1-fluoro-4-(1-iodo-2-tosylethyl)benzene **3d**

White solid. Mp: 131-132 °C; <sup>1</sup>H NMR (400 MHz; CDCl<sub>3</sub>): δ = 2.45 (s, 3H), 3.30 (dd, *J*<sub>1</sub> = 2.0, *J*<sub>2</sub> = 14.4, 1H), 3.45 (dd, *J*<sub>1</sub> = 4.4, *J*<sub>2</sub> = 14.4, 1H), 5.24 (dd, *J*<sub>1</sub> = 1.6, *J*<sub>2</sub> = 14.0, 1H), 6.96-7.00 (m, 2H),

7.24-7.29 (m, 2H), 7.37 (d,  $J = 8.0$ , 2H), 7.81 (d,  $J = 8.0$ , 2H).  $^{13}\text{C}$  NMR (100 MHz;  $\text{CDCl}_3$ ):  $\delta = 21.7, 63.9, 67.9, 115.5, 115.7, 127.5, 128.0, 130.1, 136.1, 136.7, 145.4, 161.2, 163.7$ . HRMS (ESI-TOF) Calcd for  $\text{C}_{15}\text{H}_{15}\text{FIO}_2\text{S}$ ,  $[\text{M}+\text{H}]^+$  404.9822; Found 404.9827.

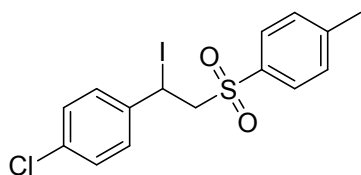

#### 1-chloro-4-(1-iodo-2-tosylethyl)benzene 3e

White solid. Mp: 143-144 °C;  $^1\text{H}$  NMR (400 MHz;  $\text{CDCl}_3$ ):  $\delta = 2.41$  (s, 3H), 4.02 (dd,  $J_1 = 4.0$ ,  $J_2 = 14.4$ , 1H), 4.25 (dd,  $J_1 = 4.4$ ,  $J_2 = 14.4$ , 1H), 5.52 (dd,  $J_1 = 4.0$ ,  $J_2 = 14.0$ , 1H), 7.07 (d,  $J = 8.4$ , 2H), 7.14 (dd,  $J_1 = 2.0$ ,  $J_2 = 6.0$ , 2H), 7.15 (t,  $J = 7.6$ , 4H), 7.41 (d,  $J = 8.0$ , 2H).  $^{13}\text{C}$  NMR (100 MHz;  $\text{CDCl}_3$ ):  $\delta = 16.7, 21.6, 65.9, 127.9, 128.5, 128.8, 129.7, 134.3, 135.9, 138.9, 144.9$ . HRMS (ESI-TOF) Calcd for  $\text{C}_{15}\text{H}_{15}\text{ClIO}_2\text{S}$ ,  $[\text{M}+\text{H}]^+$  420.9522; Found 420.9517.

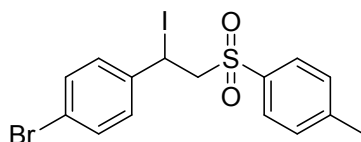

#### 1-bromo-4-(1-iodo-2-tosylethyl)benzene 3f

White solid. Mp: 144-145 °C;  $^1\text{H}$  NMR (400 MHz;  $\text{CDCl}_3$ ):  $\delta = 2.47$  (s, 3H), 3.26 (d,  $J = 14.4$  Hz, 1H), 3.43 (t,  $J = 14.0$  Hz, 1H), 5.51 (d,  $J = 9.6$  Hz, 1H), 7.17 (d,  $J = 7.6$  Hz, 2H), 7.33-7.43 (m, 4H), 7.81 (d,  $J = 7.6$  Hz, 2H).  $^{13}\text{C}$  NMR (100 MHz;  $\text{CDCl}_3$ ):  $\delta = 21.7, 63.7, 67.9, 122.1, 127.4, 128.0, 130.2, 131.8, 135.9, 139.8, 145.4$ . HRMS (ESI-TOF) Calcd for  $\text{C}_{15}\text{H}_{15}\text{BrIO}_2\text{S}$ ,  $[\text{M}+\text{H}]^+$  466.1519; Found 466.1517.

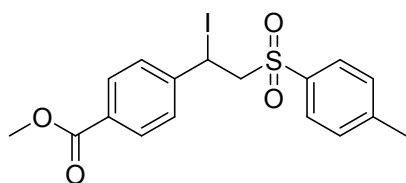

#### methyl 4-(1-iodo-2-tosylethyl)benzoate 3g

White solid. Mp: 138-139 °C;  $^1\text{H}$  NMR (400 MHz;  $\text{CDCl}_3$ ):  $\delta = 2.28$  (s, 3H), 2.36 (s, 3H), 4.06 (dd,  $J_1 = 4.0$  Hz,  $J_2 = 14.4$  Hz, 1H), 4.26 (q,  $J = 9.6$  Hz, 1H), 5.55 (q,  $J = 9.6$  Hz, 1H), 6.84 (d,  $J = 7.6$  Hz, 2H), 7.13-7.21 (m, 4H), 7.41 (d,  $J = 7.6$  Hz, 2H).  $^{13}\text{C}$  NMR (100 MHz;  $\text{CDCl}_3$ ):  $\delta = 17.2, 21.1, 21.5, 66.1, 121.8, 127.9, 128.2, 129.8, 135.9, 137.9, 144.9, 150.4, 168.7$ . HRMS (ESI-TOF) Calcd for  $\text{C}_{17}\text{H}_{18}\text{IO}_4\text{S}$ ,  $[\text{M}+\text{H}]^+$  444.9970; Found 444.9972.

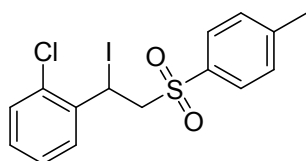

#### 1-chloro-2-(1-iodo-2-tosylethyl)benzene 3h

White solid. Mp: 108-109 °C; <sup>1</sup>H NMR (400 MHz; CDCl<sub>3</sub>): δ = 2.46 (s, 3H), 3.20 (d, *J* = 10.0 Hz, 1H), 4.26 (t, *J* = 10.0 Hz, 1H), 5.22 (d, *J* = 9.6 Hz, 1H), 6.84 (d, *J* = 8.4 Hz, 2H), 7.16-7.22 (m, 4H), 7.19 (d, *J* = 6.8 Hz, 2H), 7.41 (d, *J* = 8.4 Hz, 2H). <sup>13</sup>C NMR (100 MHz; CDCl<sub>3</sub>): δ = 21.7, 63.7, 67.9, 122.1, 127.4, 128.0, 130.2, 131.8, 135.9, 139.8, 145.4. HRMS (ESI-TOF) Calcd for C<sub>15</sub>H<sub>15</sub>ClIO<sub>2</sub>S, [M+H]<sup>+</sup> 420.9529; Found 20.9523.

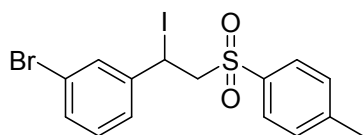

### 1-bromo-3-(1-iodo-2-tosylethyl)benzene 3i

White solid. Mp: 96-97 °C; <sup>1</sup>H NMR (400 MHz; CDCl<sub>3</sub>): δ = 2.39 (s, 3H), 4.06 (dd, *J*<sub>1</sub> = 4.0 Hz, *J*<sub>2</sub> = 14.4 Hz, 1H), 4.26 (q, *J* = 9.6 Hz, 1H), 5.48 (q, *J* = 9.6 Hz, 1H), 7.02 (t, *J* = 8.0 Hz, 1H), 7.13 (d, *J* = 8.4 Hz, 2H), 7.19 (d, *J* = 6.8 Hz, 2H), 7.26 (t, *J* = 7.6 Hz, 1H), 7.42 (d, *J* = 8.4 Hz, 2H). <sup>13</sup>C NMR (100 MHz; CDCl<sub>3</sub>): δ = 16.1, 21.6, 65.5, 122.6, 125.9, 127.8, 129.7, 130.1, 130.2, 131.5, 135.8, 142.4, 144.9. HRMS (ESI-TOF) Calcd for C<sub>15</sub>H<sub>15</sub>BrIO<sub>2</sub>S, [M+H]<sup>+</sup> 464.9021; Found 464.9025.

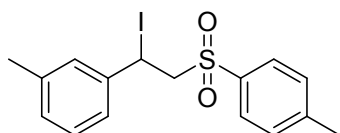

### 1-(1-iodo-2-tosylethyl)-3-methylbenzene 3j

White solid. Mp: 112-114 °C; <sup>1</sup>H NMR (400 MHz; CDCl<sub>3</sub>): δ = 2.15 (s, 3H), 2.35 (s, 3H), 4.06 (dd, *J*<sub>1</sub> = 4.0 Hz, *J*<sub>2</sub> = 14.4 Hz, 1H), 4.31 (q, *J* = 9.6 Hz, 1H), 5.54 (q, *J* = 9.6 Hz, 1H), 6.93 (d, *J* = 5.2 Hz, 2H), 6.99 (d, *J* = 7.6 Hz, 2H), 7.05 (t, *J* = 8.0 Hz, 2H), 7.10 (d, *J* = 7.6 Hz, 2H). <sup>13</sup>C NMR (100 MHz; CDCl<sub>3</sub>): δ = 18.6, 21.1, 21.5, 65.8, 124.4, 127.6, 127.9, 128.6, 129.3, 129.5, 136.1, 138.4, 140.2, 144.5. HRMS (ESI-TOF) Calcd for C<sub>16</sub>H<sub>18</sub>IO<sub>2</sub>S, [M+H]<sup>+</sup> 401.0071; Found 401.0076.

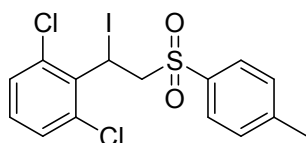

### 1,3-dichloro-2-(1-iodo-2-tosylethyl)benzene 3k

White solid. Mp: 109-110 °C; <sup>1</sup>H NMR (400 MHz; CDCl<sub>3</sub>): δ = 2.36 (s, 3H), 3.95 (dd, *J*<sub>1</sub> = 4.0 Hz, *J*<sub>2</sub> = 14.4 Hz, 1H), 4.89 (q, *J* = 9.6 Hz, 1H), 6.44 (q, *J* = 9.6 Hz, 1H), 7.00-7.05 (m, 2H), 7.16 (t, *J* = 8.0 Hz, 2H), 7.24 (t, *J* = 8.0 Hz, 1H), 7.56 (d, *J* = 8.0 Hz, 2H). <sup>13</sup>C NMR (100 MHz; CDCl<sub>3</sub>): δ = 9.2, 21.6, 62.0, 127.9, 128.8, 129.6, 129.7, 130.3, 134.0, 135.4, 135.9, 144.9. HRMS (ESI-TOF) Calcd for C<sub>15</sub>H<sub>14</sub>ICl<sub>2</sub>O<sub>2</sub>S, [M+H]<sup>+</sup> 454.9136; Found 454.9131.

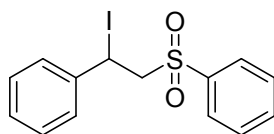

**(1-iodo-2-(phenylsulfonyl)ethyl)benzene 3l**

White solid. Mp: 84-85 °C; <sup>1</sup>H NMR (400 MHz; CDCl<sub>3</sub>): δ = 4.08 (dd, *J*<sub>1</sub> = 4.0 Hz, *J*<sub>2</sub> = 14.4 Hz, 1H), 4.34 (q, *J* = 9.6 Hz, 1H), 5.57 (q, *J* = 9.6 Hz, 1H), 7.09-7.15 (m, 3H), 7.23 (t, *J* = 7.2 Hz, 2H), 7.32 (d, *J* = 7.6 Hz, 2H), 7.36 (d, *J* = 7.2 Hz, 1H), 7.51 (d, *J* = 7.6 Hz, 2H). <sup>13</sup>C NMR (100 MHz; CDCl<sub>3</sub>): δ = 18.0, 65.9, 127.2, 127.9, 128.7, 128.8, 129.0, 133.6, 139.1, 140.4. HRMS (ESI-TOF) Calcd for C<sub>14</sub>H<sub>14</sub>IO<sub>2</sub>S, [M+H]<sup>+</sup> 372.9756; Found 372.9751.

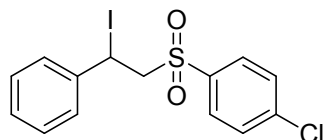**1-chloro-4-((2-iodo-2-phenylethyl)sulfonyl)benzene 3m**

White solid. Mp: 104-105 °C; <sup>1</sup>H NMR (400 MHz; CDCl<sub>3</sub>): δ = 4.07 (dd, *J*<sub>1</sub> = 4.0 Hz, *J*<sub>2</sub> = 14.4 Hz, 1H), 4.34 (q, *J* = 9.6 Hz, 1H), 5.59 (q, *J* = 9.6 Hz, 1H), 7.01 (t, *J* = 8.0 Hz, 2H), 7.13 (d, *J* = 8.4 Hz, 2H), 7.19 (d, *J* = 9.2 Hz, 2H), 7.24 (d, *J* = 8.0 Hz, 1H), 7.42 (d, *J* = 8.4 Hz, 2H). <sup>13</sup>C NMR (100 MHz; CDCl<sub>3</sub>): δ = 21.6, 65.5, 122.6, 125.9, 127.8, 130.1, 130.2, 131.5, 135.8, 140.4, 144.9. HRMS (ESI-TOF) Calcd for C<sub>14</sub>H<sub>14</sub>IClO<sub>2</sub>S, [M+H]<sup>+</sup> 406.9366; Found 406.9361.

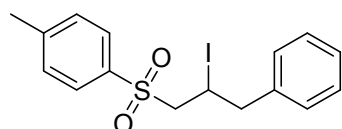**1-((2-iodo-3-phenylpropyl)sulfonyl)-4-methylbenzene 3n**

White solid. Mp: 81-82 °C; <sup>1</sup>H NMR (400 MHz; CDCl<sub>3</sub>): δ = 2.49 (s, 3H), 3.15 (dd, *J*<sub>1</sub> = 4.0 Hz, *J*<sub>2</sub> = 14.4 Hz, 1H), 3.55 (q, *J* = 9.6 Hz, 1H), 3.80 (t, *J* = 8.8 Hz, 2H), 4.56 (d, *J* = 7.6 Hz, 1H), 7.23 (d, *J* = 8.0 Hz, 2H), 7.31-7.33 (m, 5H), 7.39 (d, *J* = 8.0 Hz, 2H). <sup>13</sup>C NMR (100 MHz; CDCl<sub>3</sub>): δ = 21.6, 21.7, 45.5, 64.9, 127.2, 128.1, 128.5, 129.2, 130.2, 136.3, 138.3, 145.3. HRMS (ESI-TOF) Calcd for C<sub>16</sub>H<sub>18</sub>IO<sub>2</sub>S, [M+H]<sup>+</sup> 401.0072; Found 401.0076.

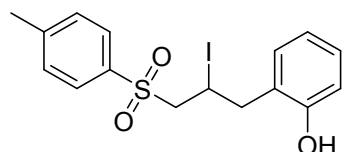**2-((2-iodo-3-tosylpropyl)phenol) 3o**

White solid. Mp: 82-83 °C; <sup>1</sup>H NMR (400 MHz; CDCl<sub>3</sub>): δ = 2.46 (s, 3H), 3.15 (dd, *J*<sub>1</sub> = 4.0 Hz, *J*<sub>2</sub> = 14.4 Hz, 1H), 3.59 (q, *J* = 9.6 Hz, 1H), 3.86 (t, *J* = 8.0 Hz, 2H), 4.73 (q, *J* = 4.4 Hz, 1H), 6.00 (s, 1H), 6.81-6.88 (m, 2H), 7.09-7.14 (m, 2H), 7.17 (d, *J* = 7.6 Hz, 2H), 7.37 (d, *J* = 8.0 Hz, 2H). <sup>13</sup>C NMR (100 MHz; CDCl<sub>3</sub>): δ = 19.7, 21.7, 41.4, 65.3, 115.9, 120.4, 124.6, 128.2, 128.8, 130.2, 131.6, 135.9, 145.4, 154.1. HRMS (ESI-TOF) Calcd for C<sub>16</sub>H<sub>18</sub>IO<sub>3</sub>S, [M+H]<sup>+</sup> 417.0021; Found 417.0015.

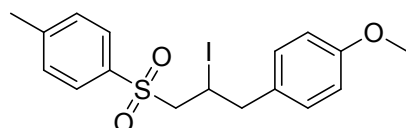

### 1-((2-iodo-3-(4-methoxyphenyl)propyl)sulfonyl)-4-methylbenzene 3p

White solid. Mp: 94-95 °C; <sup>1</sup>H NMR (400 MHz; CDCl<sub>3</sub>): δ = 2.48 (s, 3H), 3.12 (dd, *J*<sub>1</sub> = 4.0 Hz, *J*<sub>2</sub> = 14.4 Hz, 1H), 3.44 (q, *J* = 9.6 Hz, 1H), 3.78 (t, *J* = 9.6 Hz, 2H), 3.80 (s, 3H), 4.55 (q, *J* = 9.6 Hz, 1H), 6.85 (dd, *J*<sub>1</sub> = 2.0 Hz, *J*<sub>2</sub> = 6.8 Hz, 2H), 7.15 (d, *J* = 8.4 Hz, 2H), 7.39 (d, *J* = 8.0 Hz, 2H), 7.82 (d, *J* = 8.4 Hz, 2H). <sup>13</sup>C NMR (100 MHz; CDCl<sub>3</sub>): δ = 21.7, 22.5, 44.6, 55.2, 64.8, 113.9, 128.1, 130.2, 130.3, 136.3, 145.3, 158.8. HRMS (ESI-TOF) Calcd for C<sub>17</sub>H<sub>20</sub>IO<sub>3</sub>S, [M+H]<sup>+</sup> 431.0178; Found 431.0176.

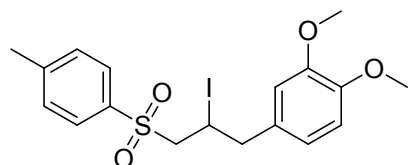

### 4-(2-iodo-3-tosylpropyl)-1,2-dimethoxybenzene 3q

White solid. Mp: 107-108 °C; <sup>1</sup>H NMR (400 MHz; CDCl<sub>3</sub>): δ = 2.44 (s, 3H), 3.12 (dd, *J*<sub>1</sub> = 4.0 Hz, *J*<sub>2</sub> = 14.4 Hz, 1H), 3.43 (q, *J* = 9.6 Hz, 1H), 3.74 (t, *J* = 9.6 Hz, 2H), 3.85 (s, 3H), 3.86 (s, 3H), 4.52 (q, *J* = 9.6 Hz, 1H), 6.67-6.80 (m, 3H), 7.35 (d, *J* = 8.0 Hz, 2H), 7.77 (d, *J* = 8.0 Hz, 2H). <sup>13</sup>C NMR (100 MHz; CDCl<sub>3</sub>): δ = 21.7, 21.8, 45.1, 55.9, 64.5, 110.9, 112.3, 121.5, 128.0, 130.2, 130.7, 136.2, 145.3, 148.2, 148.8. HRMS (ESI-TOF) Calcd for C<sub>18</sub>H<sub>22</sub>IO<sub>4</sub>S, [M+H]<sup>+</sup> 461.0283; Found 461.0290.

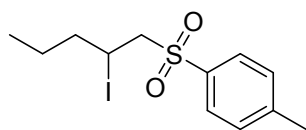

### 1-((2-iodopentyl)sulfonyl)-4-methylbenzene 6a

Colorless liquid; <sup>1</sup>H NMR (400 MHz; CDCl<sub>3</sub>): δ = 1.24-1.41 (m, 3H), 1.53-1.56 (m, 2H), 1.83 (q, *J* = 4.8 Hz, 1H), 1.93 (t, *J* = 3.2 Hz, 1H), 2.45 (s, 3H), 3.67-3.80 (m, 2H), 4.43 (q, *J* = 4.0 Hz, 1H), 7.37 (d, *J* = 8.0 Hz, 2H), 7.77 (d, *J* = 8.4 Hz, 2H). <sup>13</sup>C NMR (100 MHz; CDCl<sub>3</sub>): δ = 12.9, 21.7, 22.2, 22.8, 41.1, 65.9, 128.0, 130.1, 136.4, 145.2. HRMS (ESI-TOF) Calcd for C<sub>12</sub>H<sub>18</sub>IO<sub>2</sub>S, [M+H]<sup>+</sup> 353.0071; Found 353.0075.

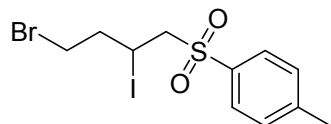

### 1-((4-bromo-2-iodobutyl)sulfonyl)-4-methylbenzene 6b

White solid. Mp: 73-74 °C; <sup>1</sup>H NMR (400 MHz; CDCl<sub>3</sub>): δ = 2.28-2.33 (m, 1H), 2.46 (s, 3H), 2.62 (q, *J* = 6.4 Hz, 1H), 3.43 (t, *J* = 4.4 Hz, 1H), 3.59 (t, *J* = 4.0 Hz, 1H), 3.72-3.87 (m, 2H), 4.50 (q, *J* = 3.2 Hz, 1H), 7.38 (d, *J* = 8.0 Hz, 2H), 7.80 (d, *J* = 8.4 Hz, 2H). <sup>13</sup>C NMR (100 MHz; CDCl<sub>3</sub>): δ = 19.6, 21.8, 33.1, 40.9, 65.5, 128.2, 130.3, 135.7, 145.5. HRMS (ESI-TOF) Calcd for C<sub>11</sub>H<sub>15</sub>IBrO<sub>2</sub>S, [M+H]<sup>+</sup> 416.9021; Found 416.9026.

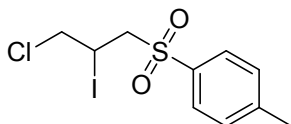

**1-((3-chloro-2-iodopropyl)sulfonyl)-4-methylbenzene 6c**

Colorless liquid; <sup>1</sup>H NMR (400 MHz; CDCl<sub>3</sub>): δ = 2.46 (s, 3H), 3.62 (dd, *J*<sub>1</sub> = 4.4 Hz, *J*<sub>2</sub> = 14.4 Hz, 1H), 3.88-3.99 (m, 2H), 4.08 (q, *J* = 7.6 Hz, 1H), 4.64 (q, *J* = 8.0 Hz, 1H), 7.39 (d, *J* = 8.4 Hz, 2H), 7.80 (d, *J* = 8.4 Hz, 2H). <sup>13</sup>C NMR (100 MHz; CDCl<sub>3</sub>): δ = 16.4, 21.8, 50.1, 61.9, 128.1, 130.3, 135.9, 145.6. HRMS (ESI-TOF) Calcd for C<sub>10</sub>H<sub>13</sub>IClO<sub>2</sub>S, [M+H]<sup>+</sup> 358.9369; Found 358.9363.

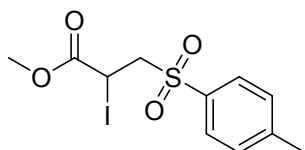

**methyl 2-iodo-3-tosylpropanoate 6d**

White solid. Mp: 70-71 °C; <sup>1</sup>H NMR (400 MHz; CDCl<sub>3</sub>): δ = 2.46 (s, 3H), 3.57 (dd, *J*<sub>1</sub> = 2.4 Hz, *J*<sub>2</sub> = 14.0 Hz, 1H), 3.67 (s, 3H), 4.17 (q, *J* = 7.6 Hz, 1H), 4.64 (q, *J* = 8.0 Hz, 1H), 7.38 (d, *J* = 8.0 Hz, 2H), 7.76 (d, *J* = 8.4 Hz, 2H). <sup>13</sup>C NMR (100 MHz; CDCl<sub>3</sub>): δ = 5.7, 21.7, 53.4, 61.9, 128.4, 130.1, 135.4, 145.6, 169.9. HRMS (ESI-TOF) Calcd for C<sub>11</sub>H<sub>14</sub>IO<sub>4</sub>S, [M+H]<sup>+</sup> 368.9654; Found 368.9651.

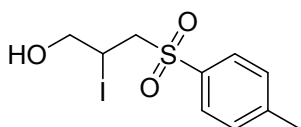

**2-iodo-3-tosylpropan-1-ol 6e**

Colorless liquid °C; <sup>1</sup>H NMR (400 MHz; CDCl<sub>3</sub>): δ = 2.45 (s, 3H), 3.36 (dd, *J*<sub>1</sub> = 3.6 Hz, *J*<sub>2</sub> = 14.4 Hz, 1H), 3.58 (q, *J* = 6.4 Hz, 1H), 3.73-3.79 (m, 2H), 4.60 (q, *J* = 6.8 Hz, 1H), 7.41 (d, *J* = 8.0 Hz, 2H), 7.79 (d, *J* = 8.4 Hz, 2H). <sup>13</sup>C NMR (100 MHz; CDCl<sub>3</sub>): δ = 7.02, 21.8, 29.4, 63.9, 116.8, 128.0, 130.5, 135.5, 146.0. HRMS (ESI-TOF) Calcd for C<sub>10</sub>H<sub>14</sub>IO<sub>3</sub>S, [M+H]<sup>+</sup> 340.9708; Found 340.9703.

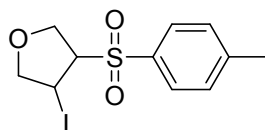

**3-iodo-4-tosyltetrahydrofuran 6f**

Colorless liquid °C; <sup>1</sup>H NMR (400 MHz; CDCl<sub>3</sub>): δ = 2.49 (s, 3H), 3.95-4.02 (m, 3H), 4.19 (q, *J* = 8.0 Hz, 1H), 4.37 (dd, *J*<sub>1</sub> = 4.4 Hz, *J*<sub>2</sub> = 14.0 Hz, 1H), 4.48 (q, *J* = 5.6 Hz, 1H), 7.42 (d, *J* = 8.0 Hz, 2H), 7.80 (d, *J* = 6.4 Hz, 2H). <sup>13</sup>C NMR (100 MHz; CDCl<sub>3</sub>): δ = 13.6, 21.8, 66.8, 74.0, 78.7, 128.7, 130.3, 134.9, 145.7. HRMS (ESI-TOF) Calcd for C<sub>11</sub>H<sub>14</sub>IO<sub>3</sub>S, [M+H]<sup>+</sup> 352.9708; Found 352.9704.



IV.  $^1\text{H}$  NMR and  $^{13}\text{C}$  NMR spectra copies of compounds 3 and 6  
Compound 3a

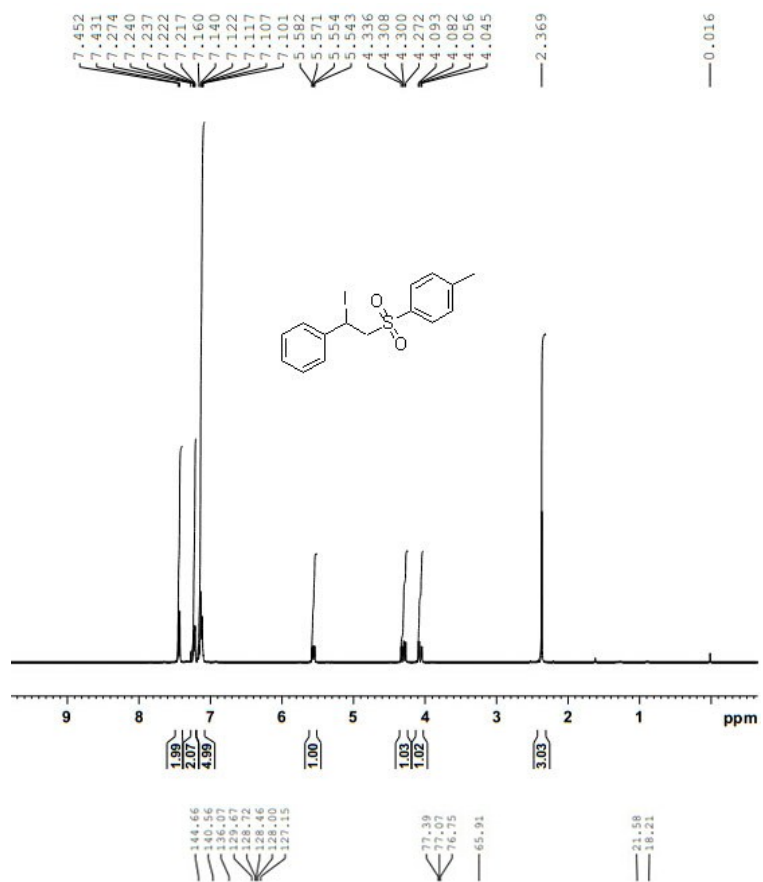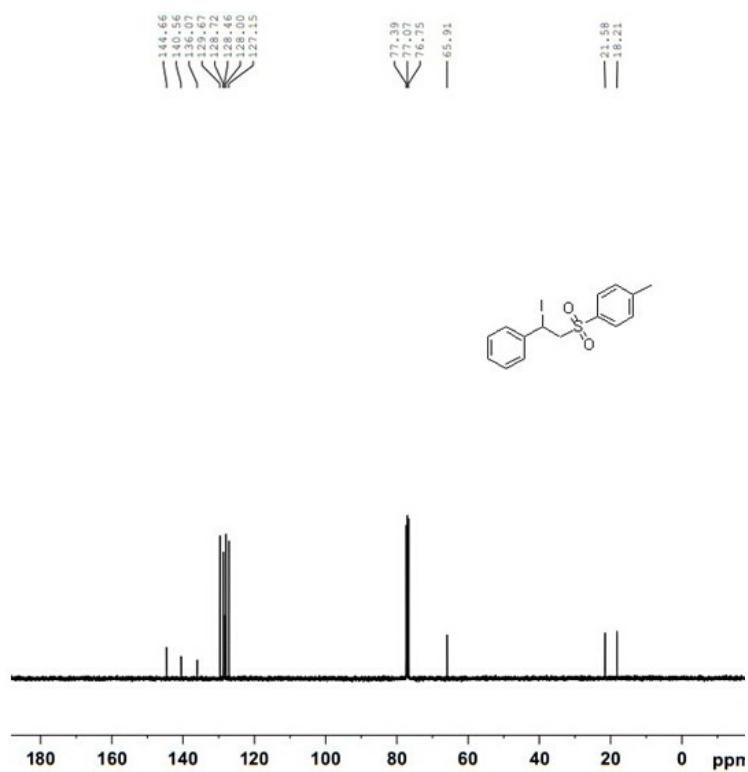

# Compound 3b

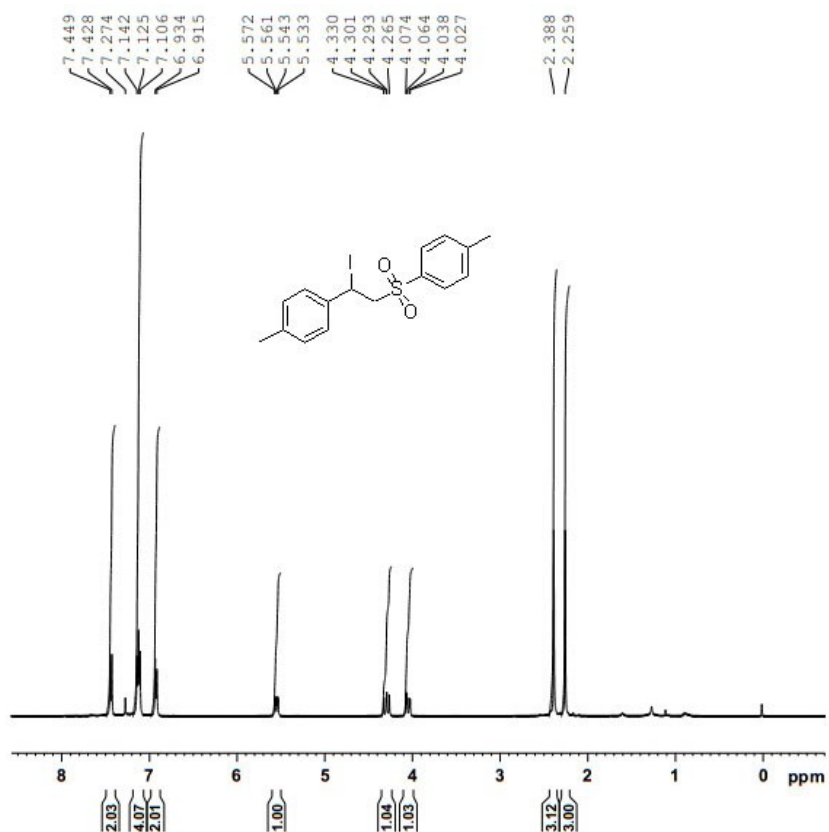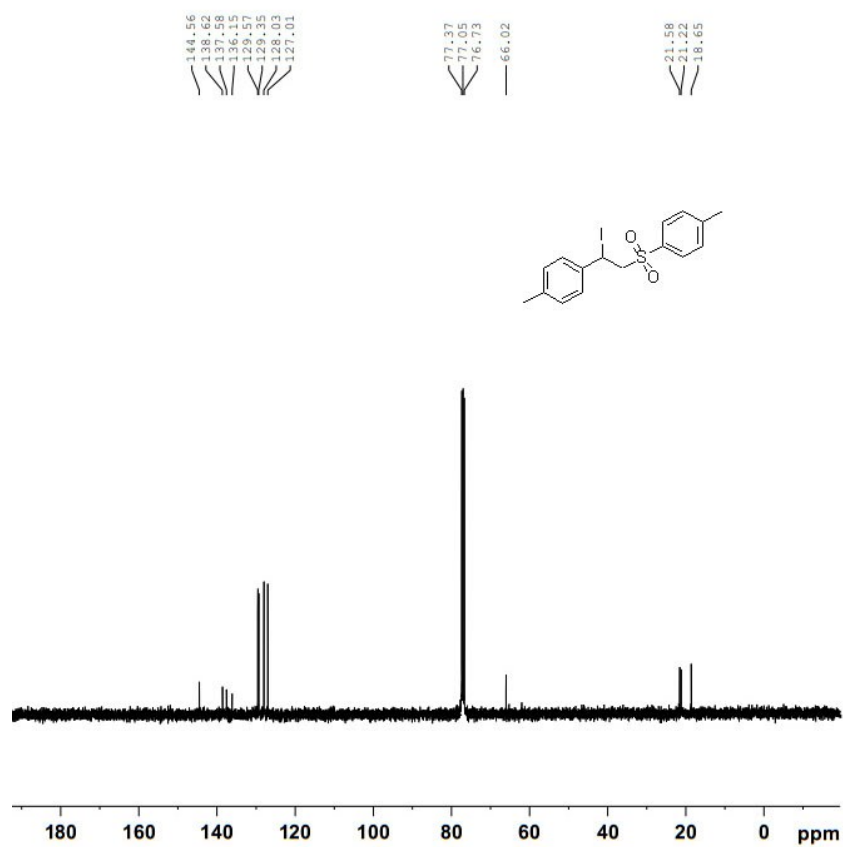

# Compound 3c

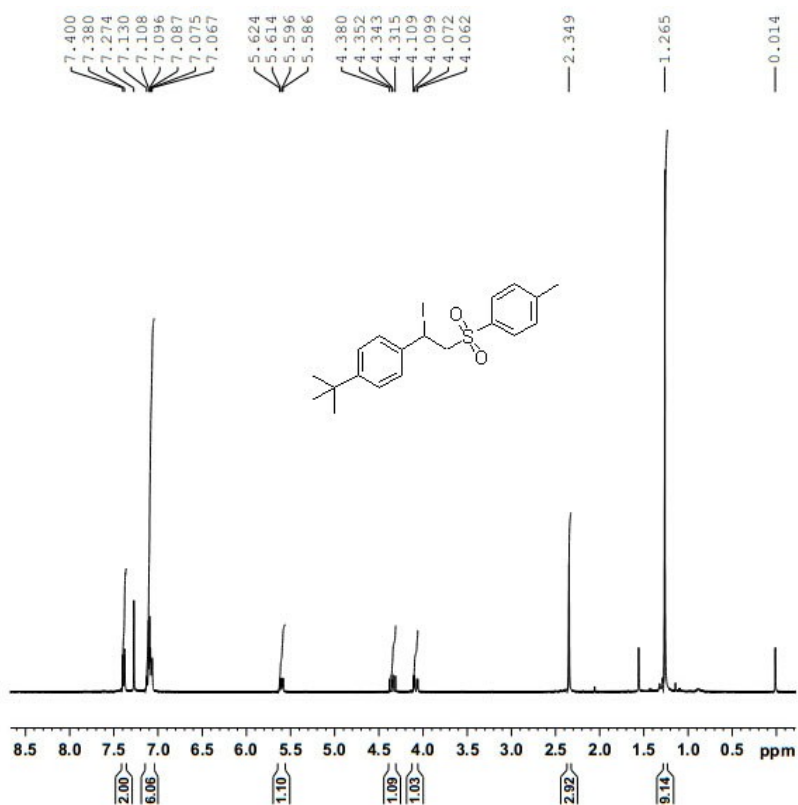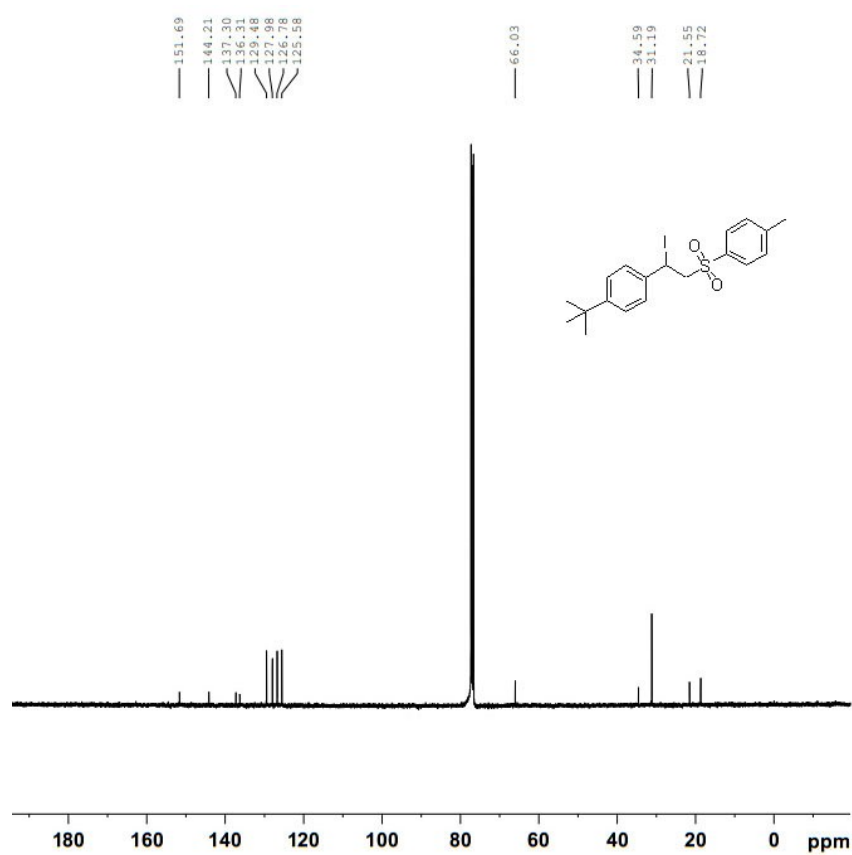

# Compound 3d

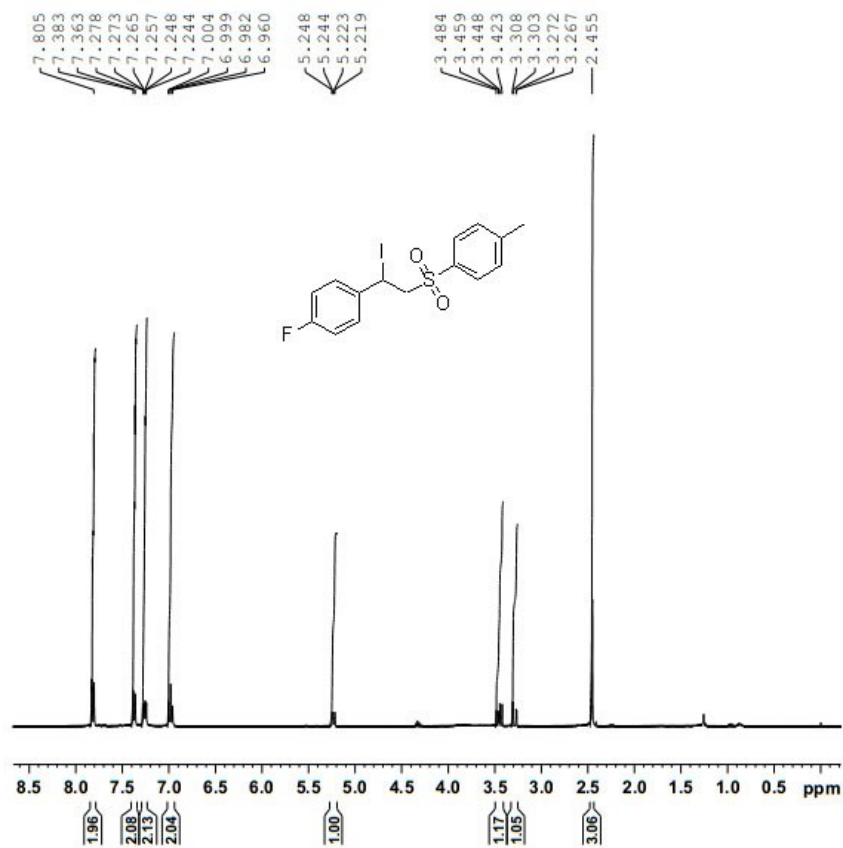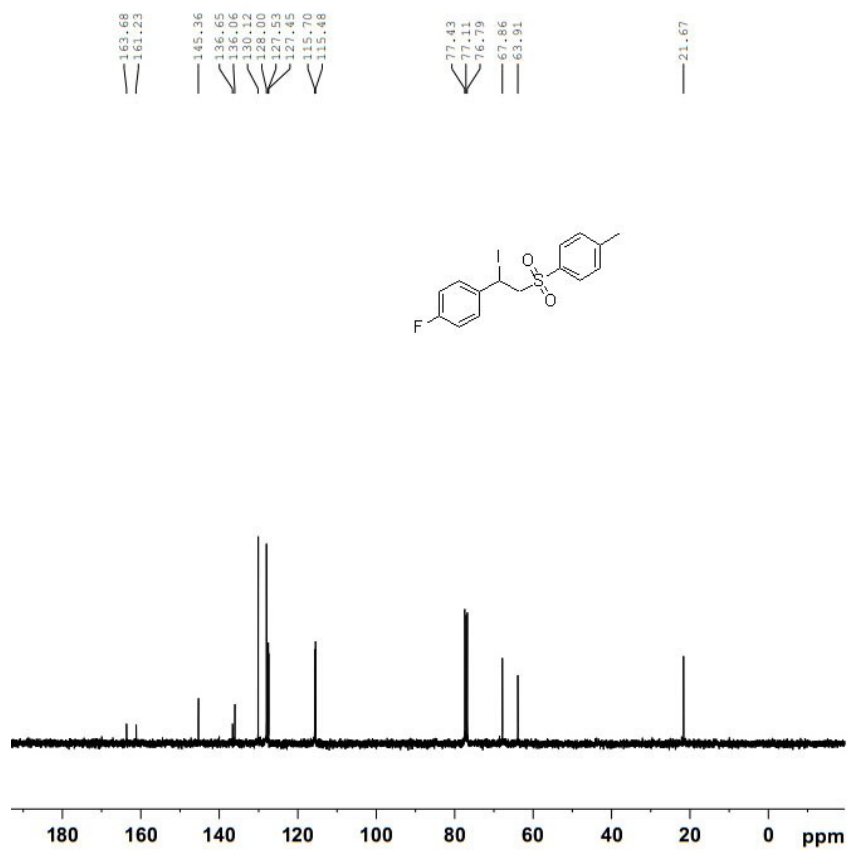

Compound 3e

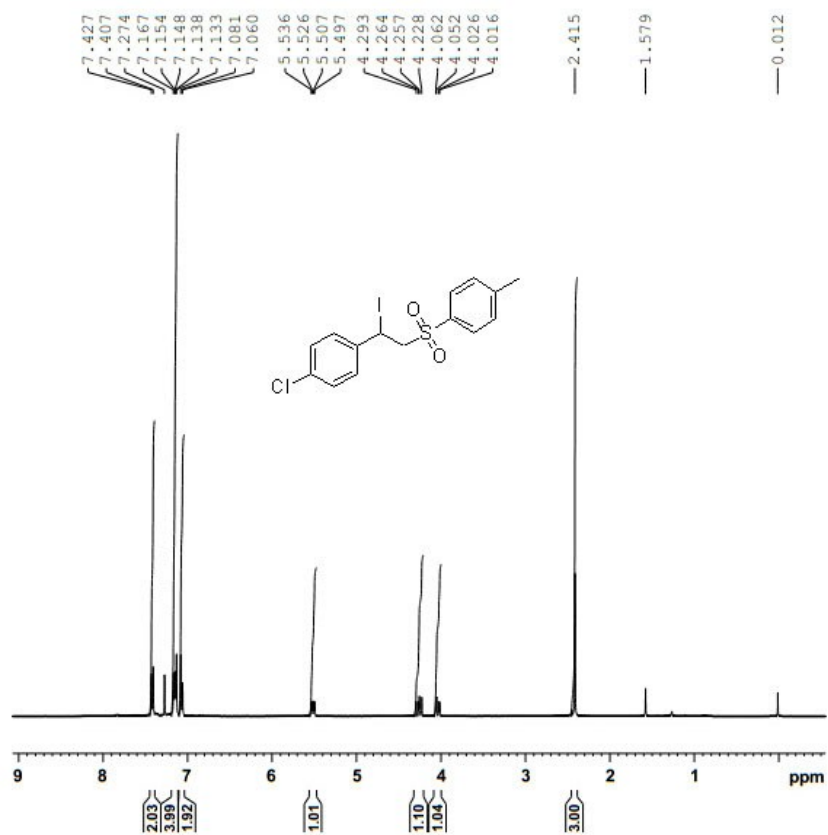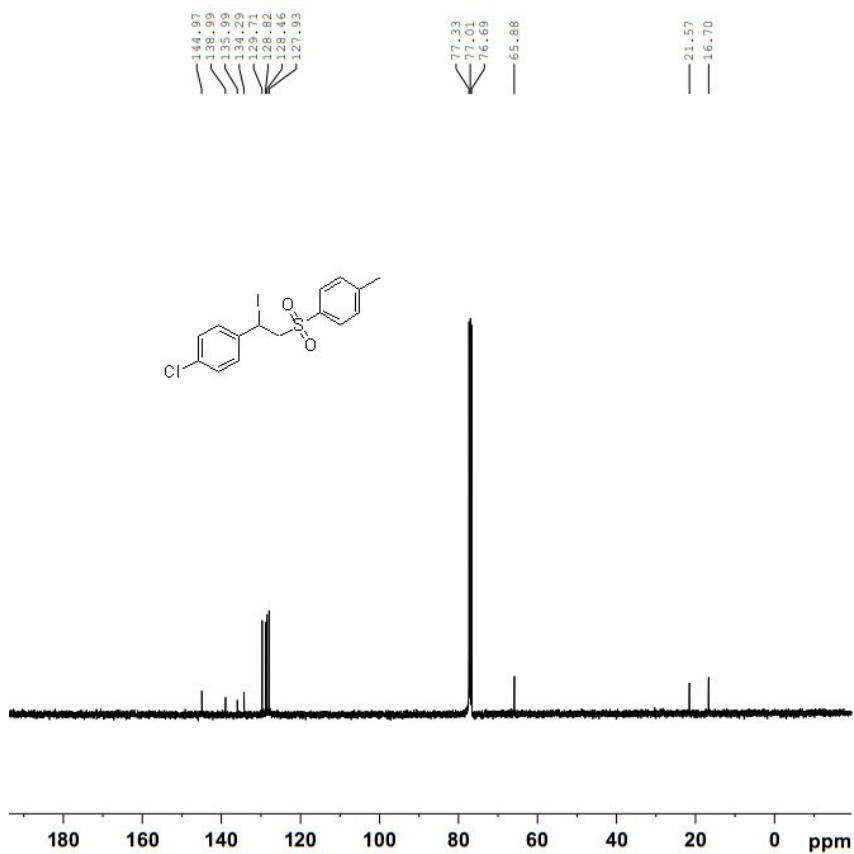

Compound 3f

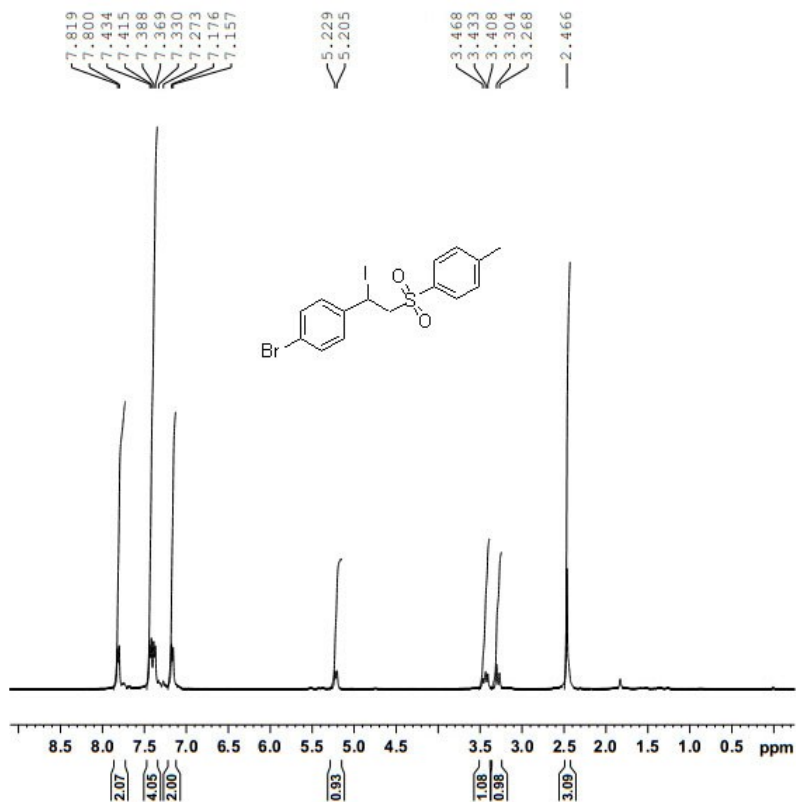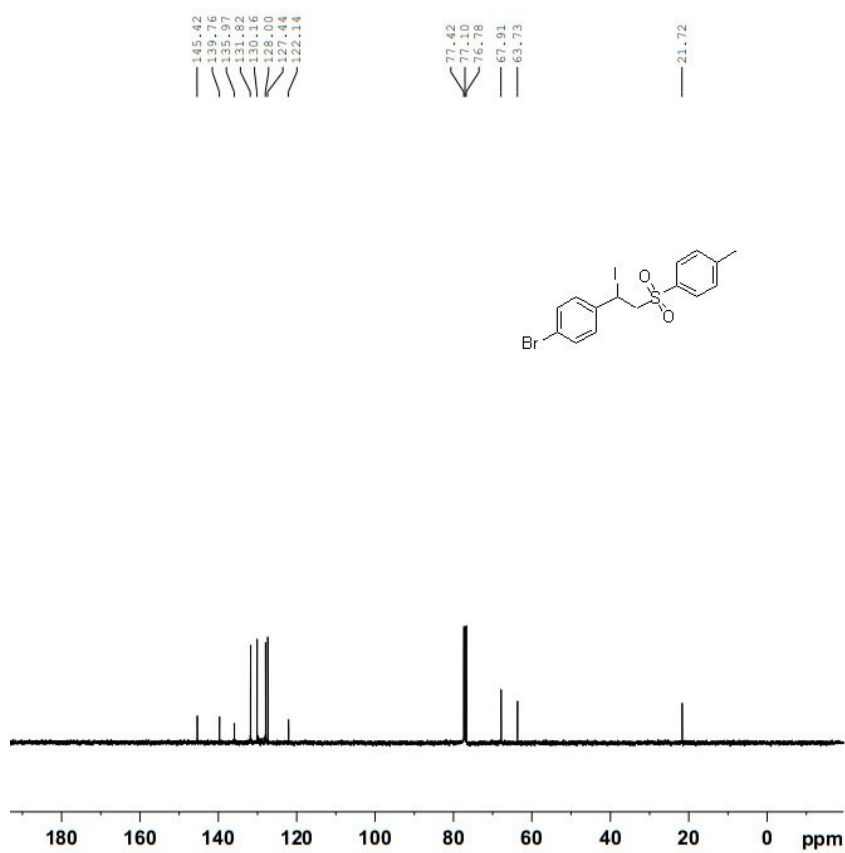

Compound 3g

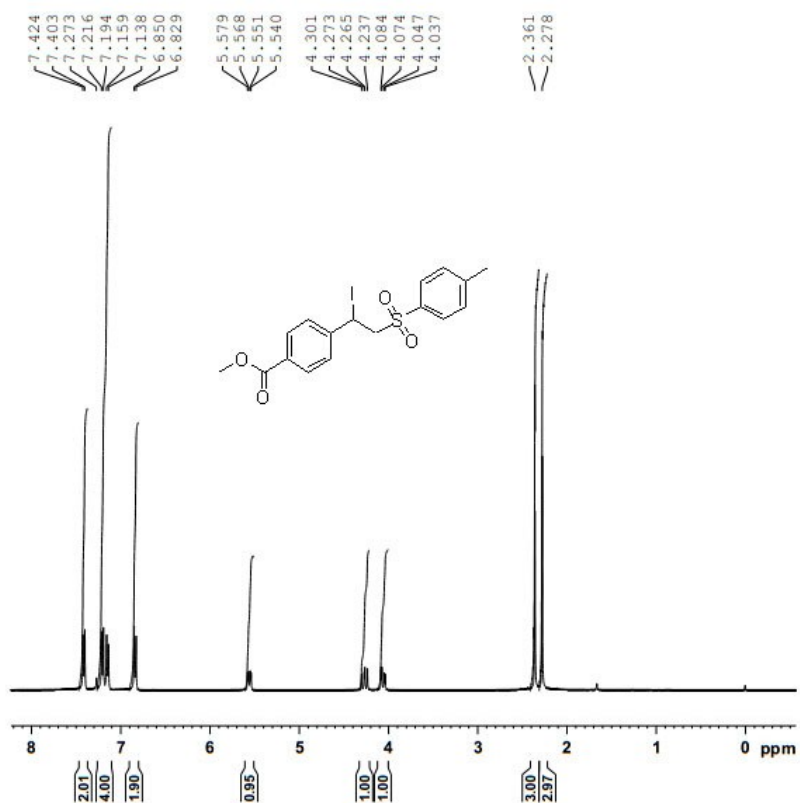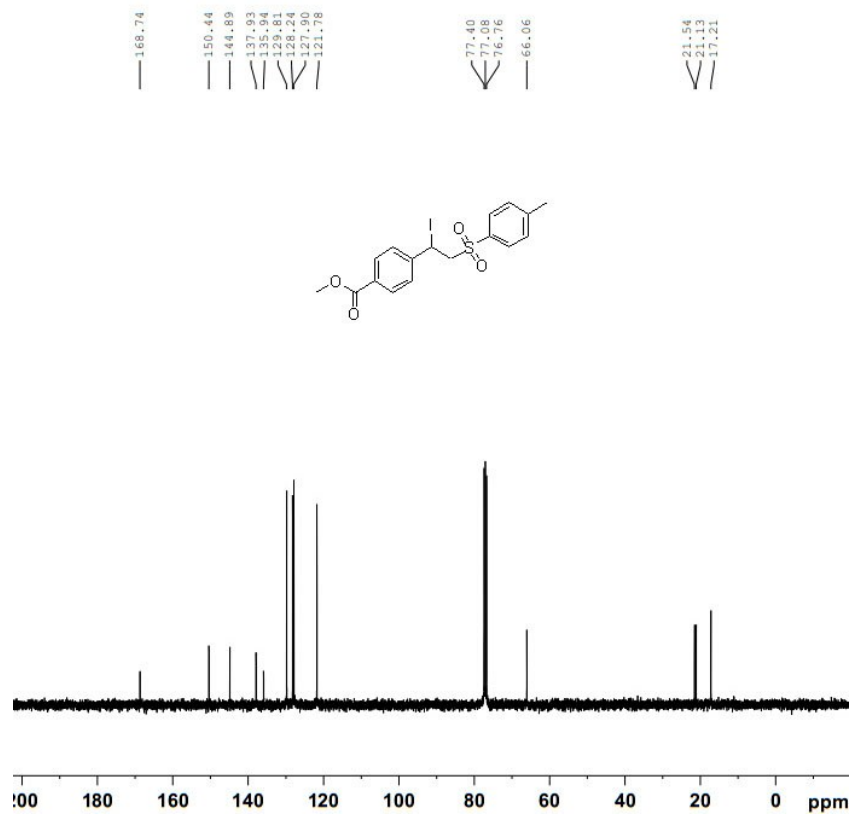

Compound 3h

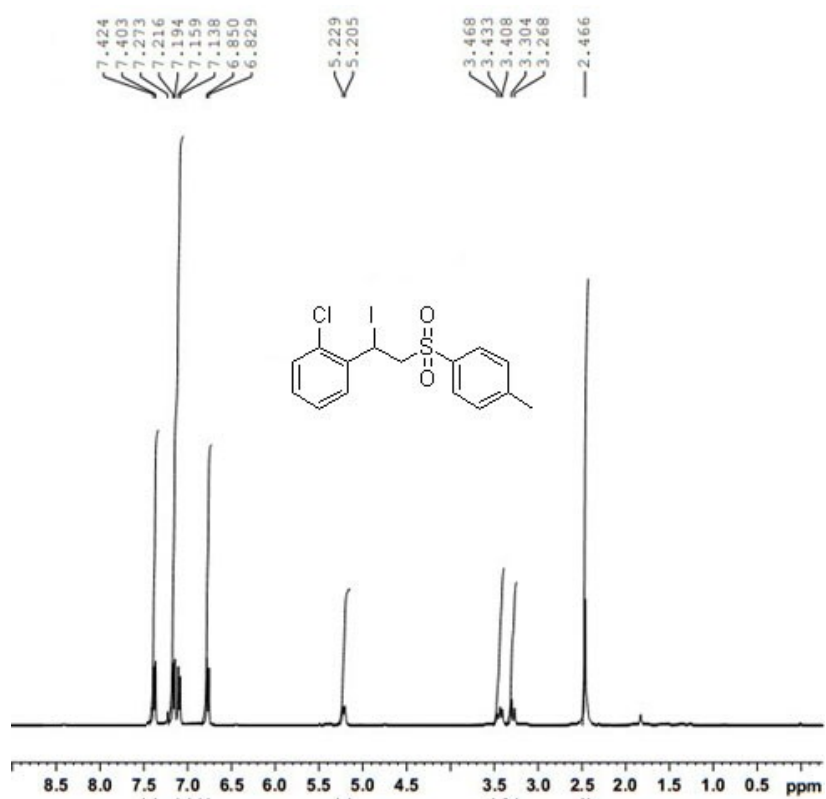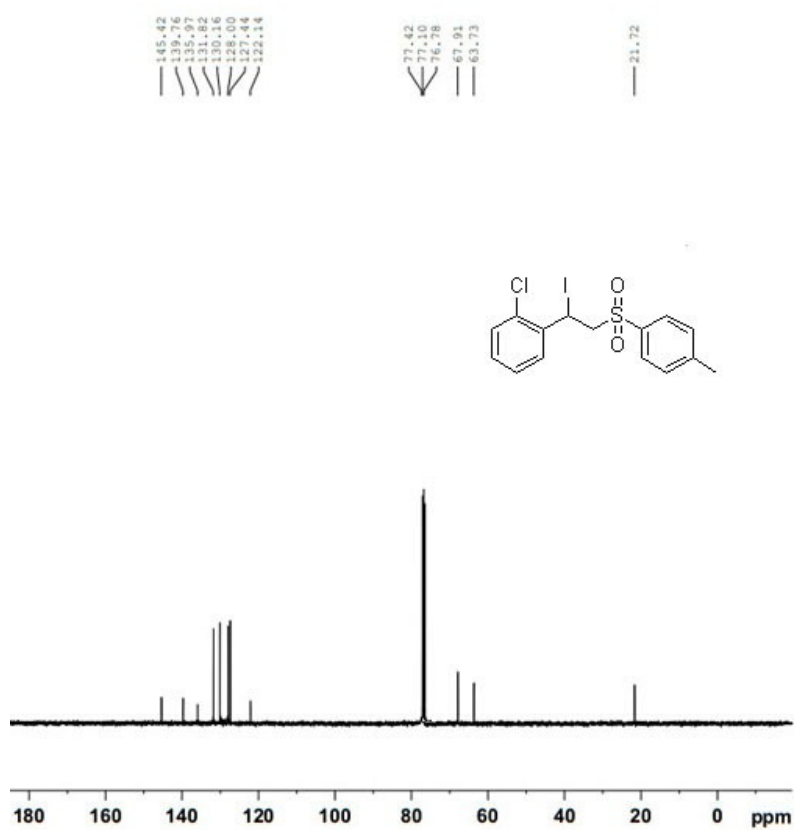



**Compound 3i**

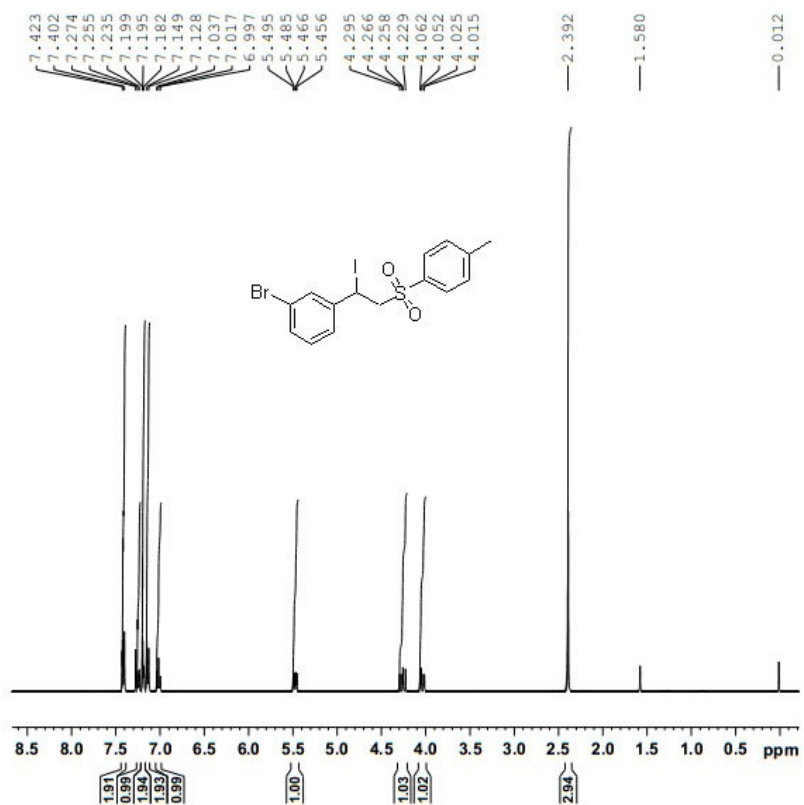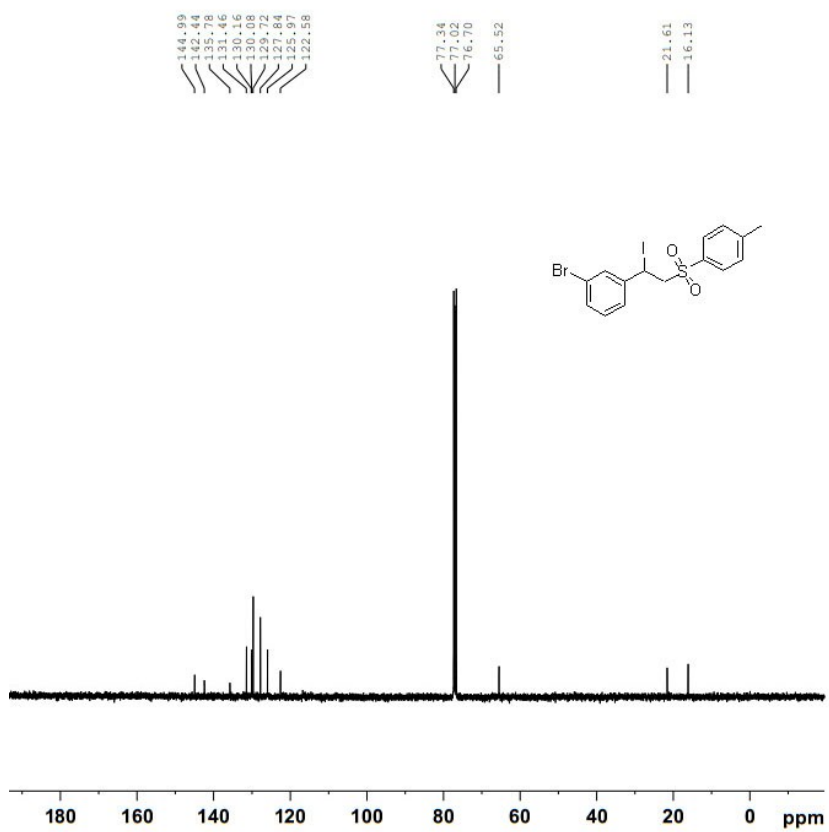

# Compound 3j

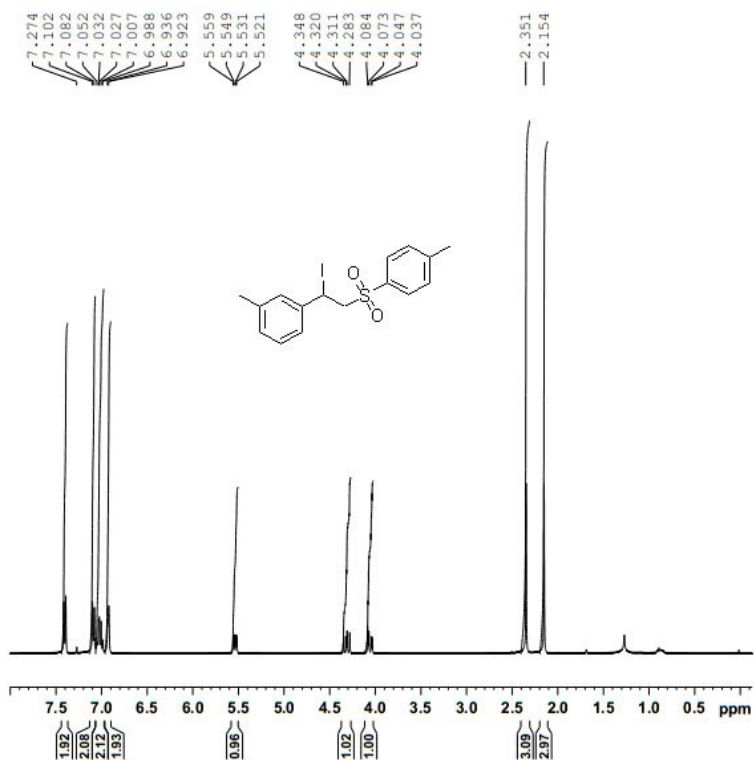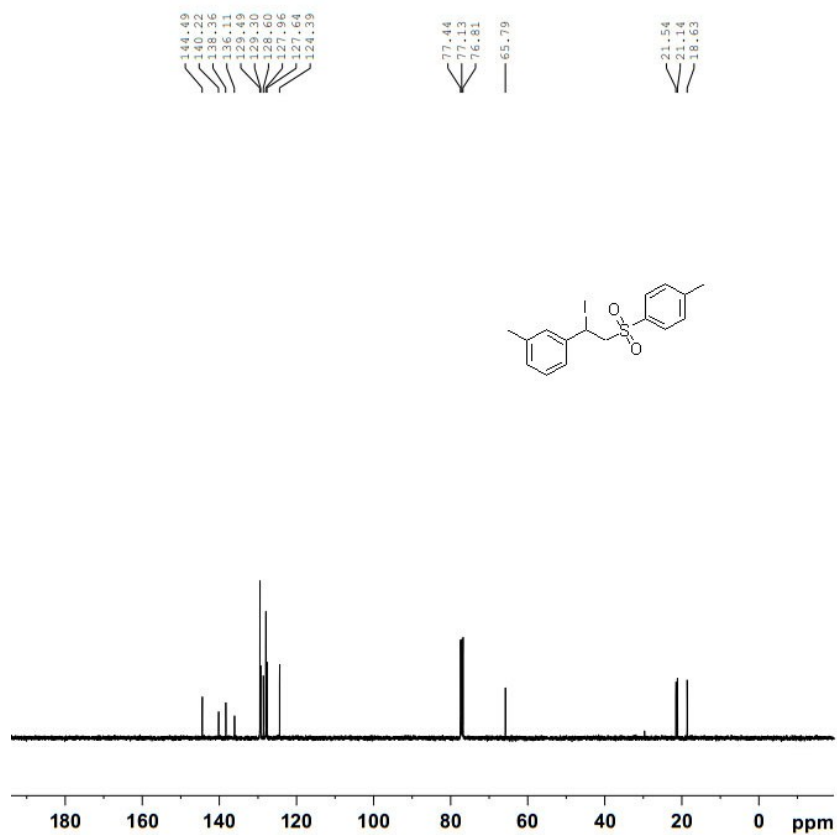

Compound 3k

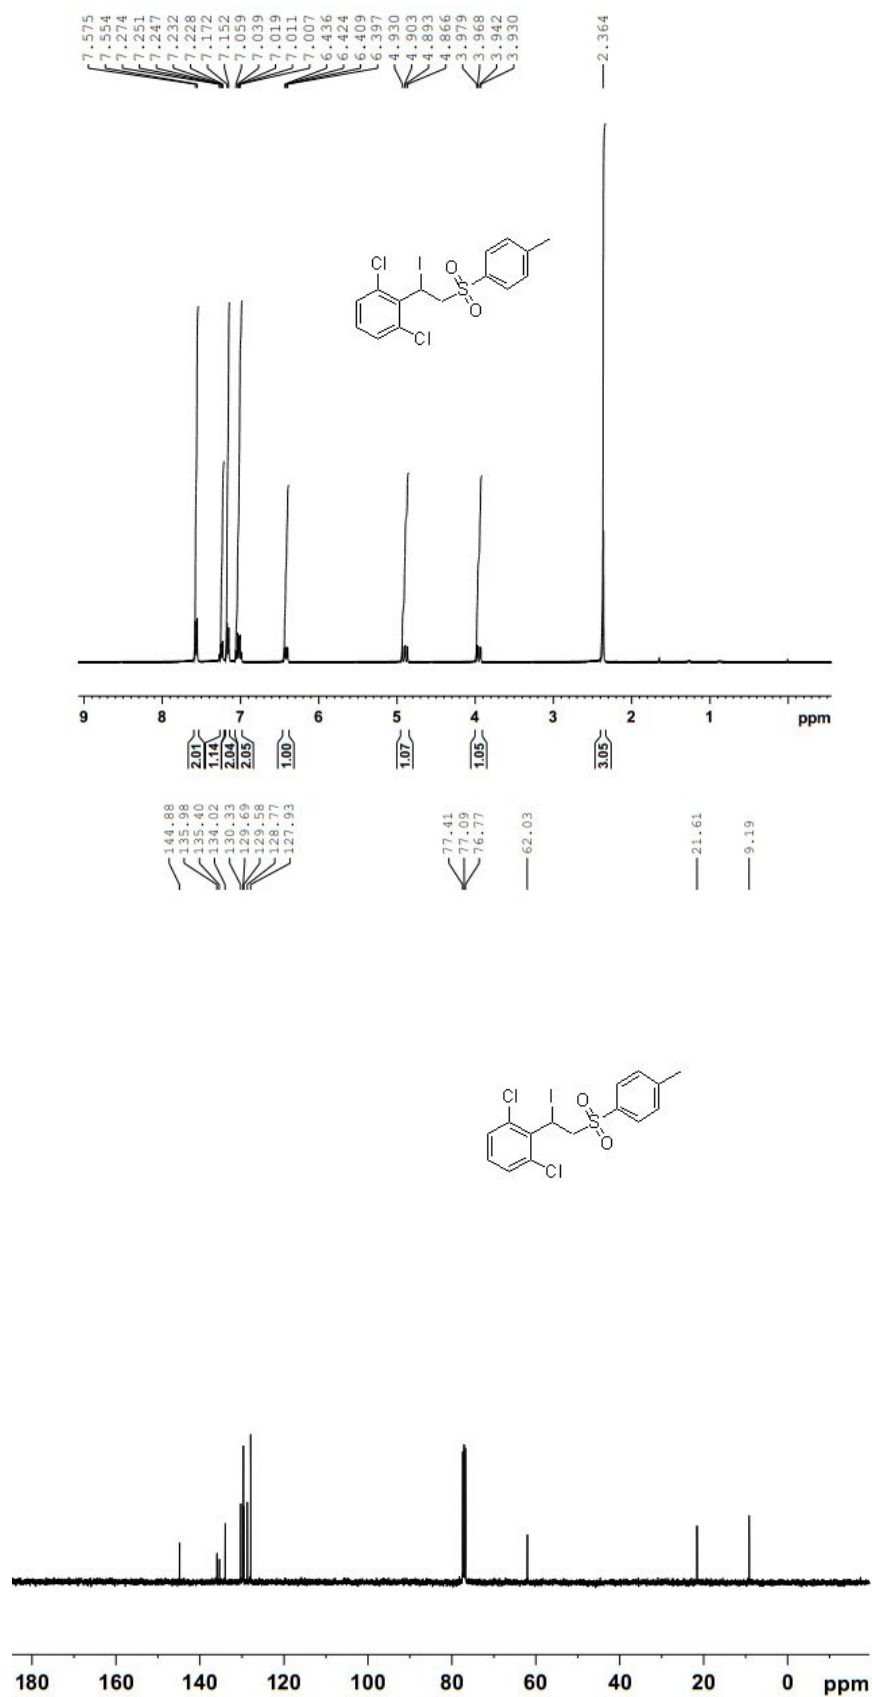

Compound 3l

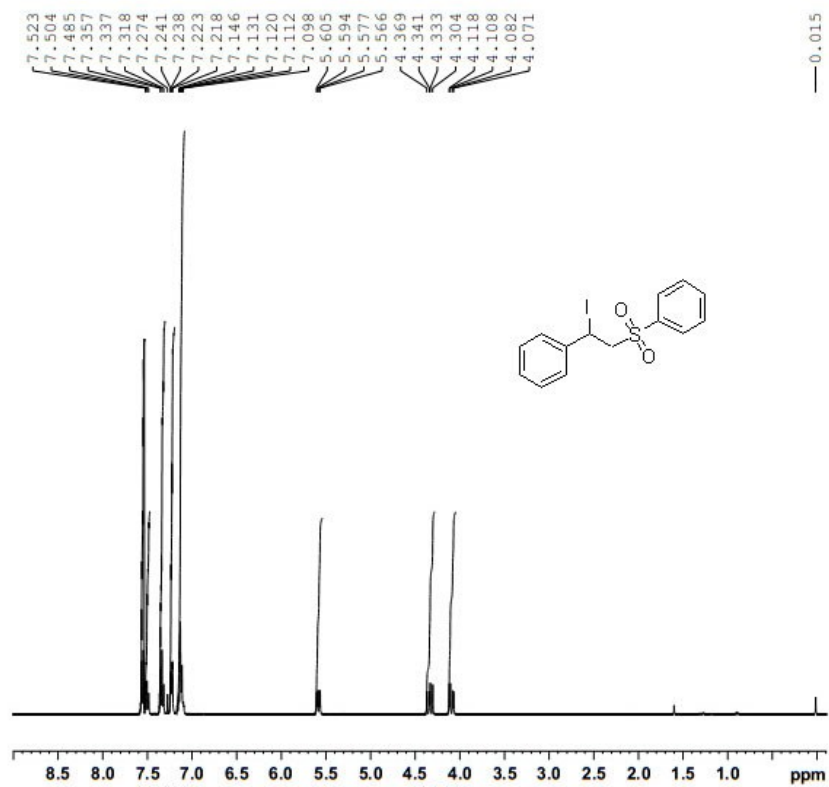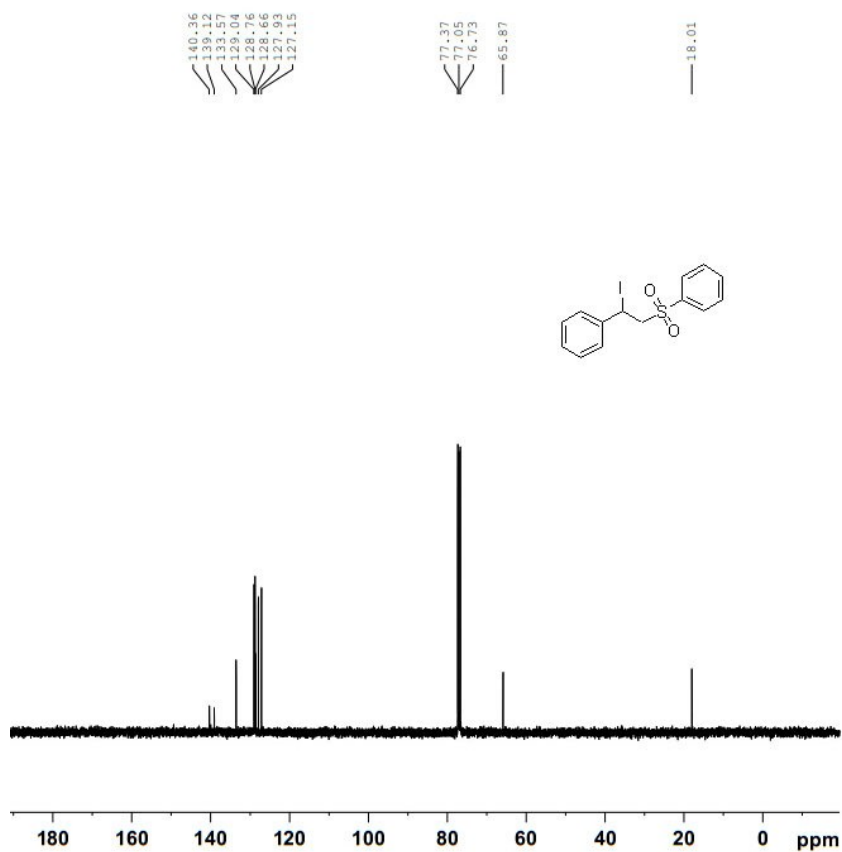

# Compound 3m

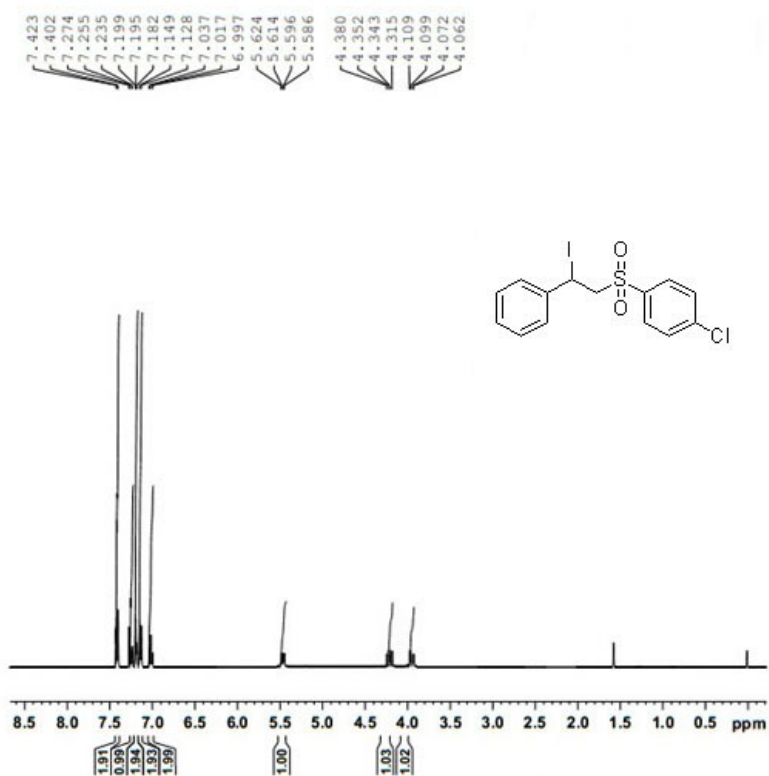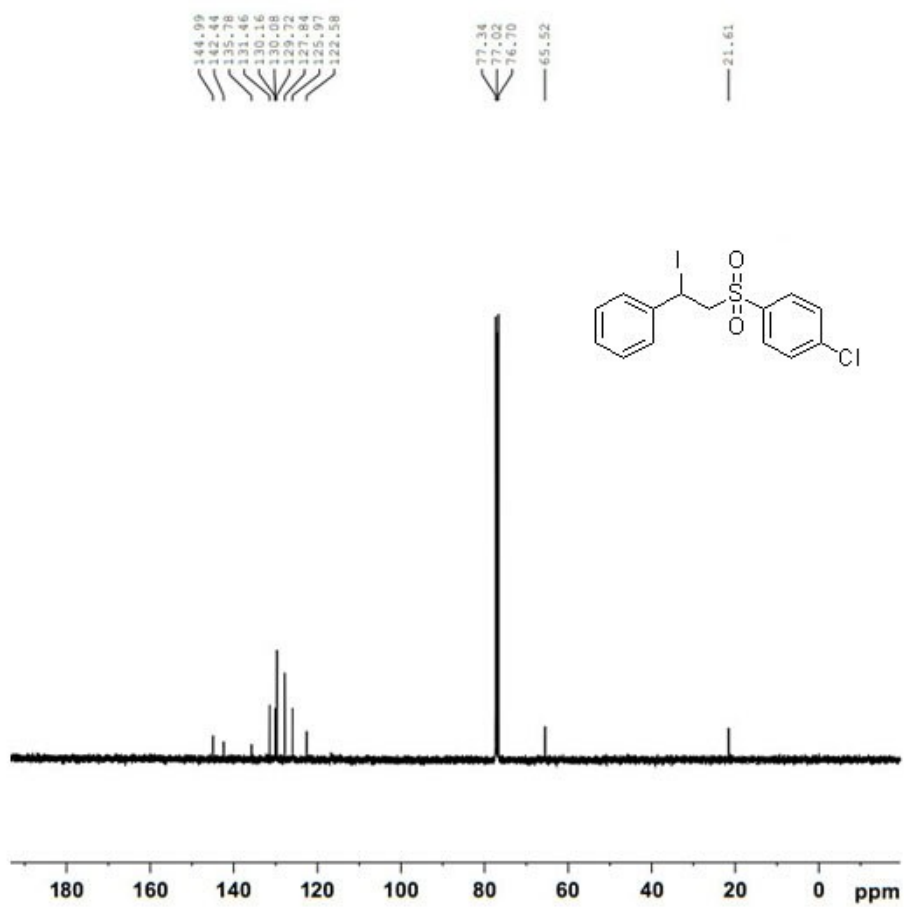

**Compound 3n**

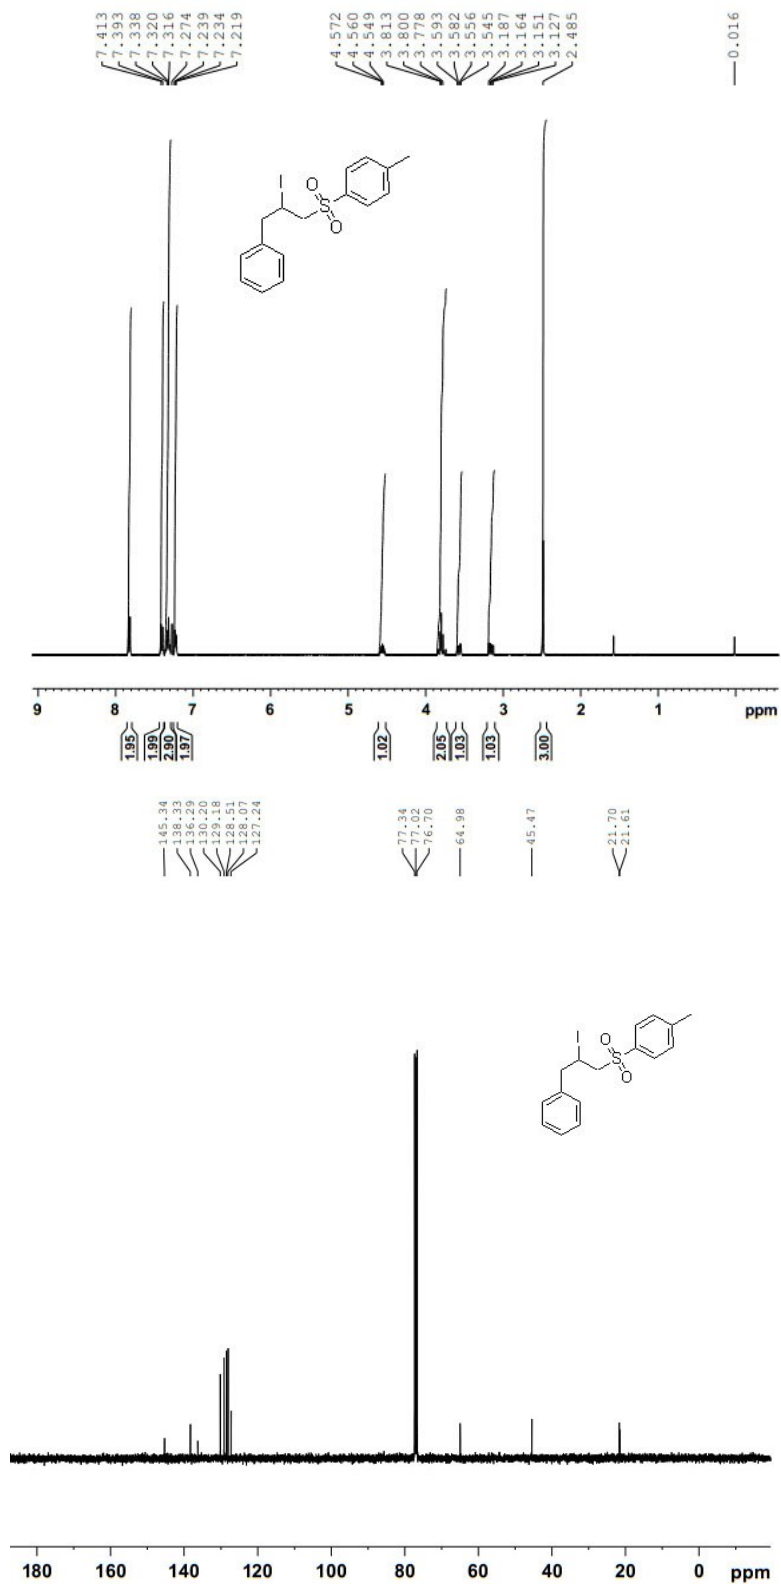

# Compound 3o

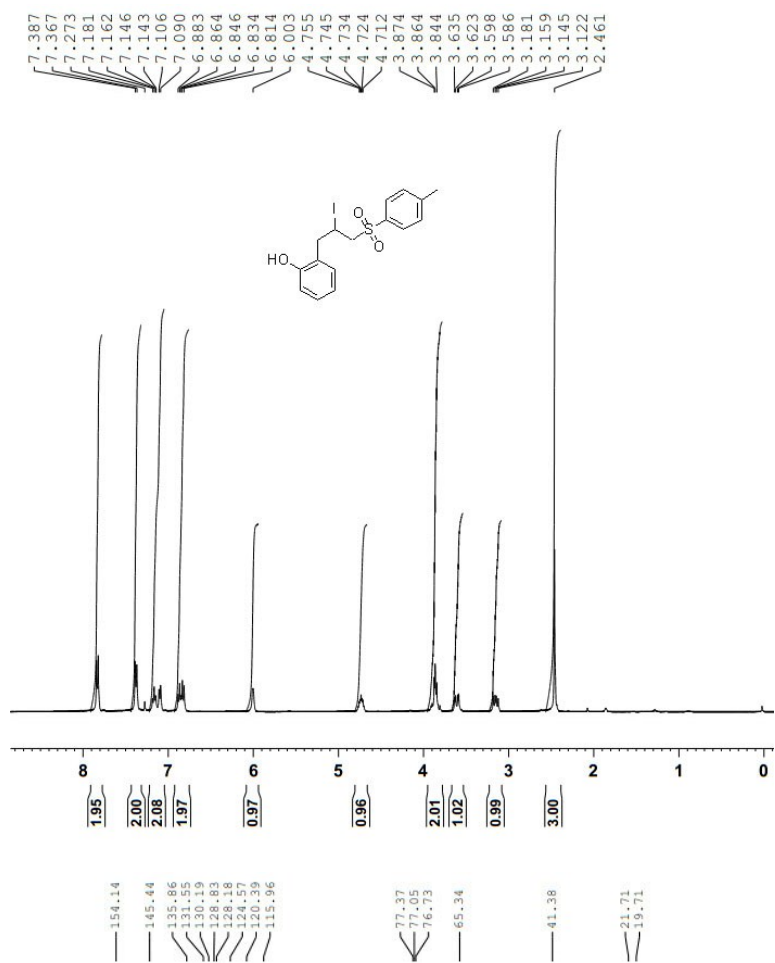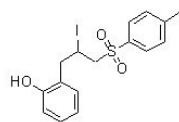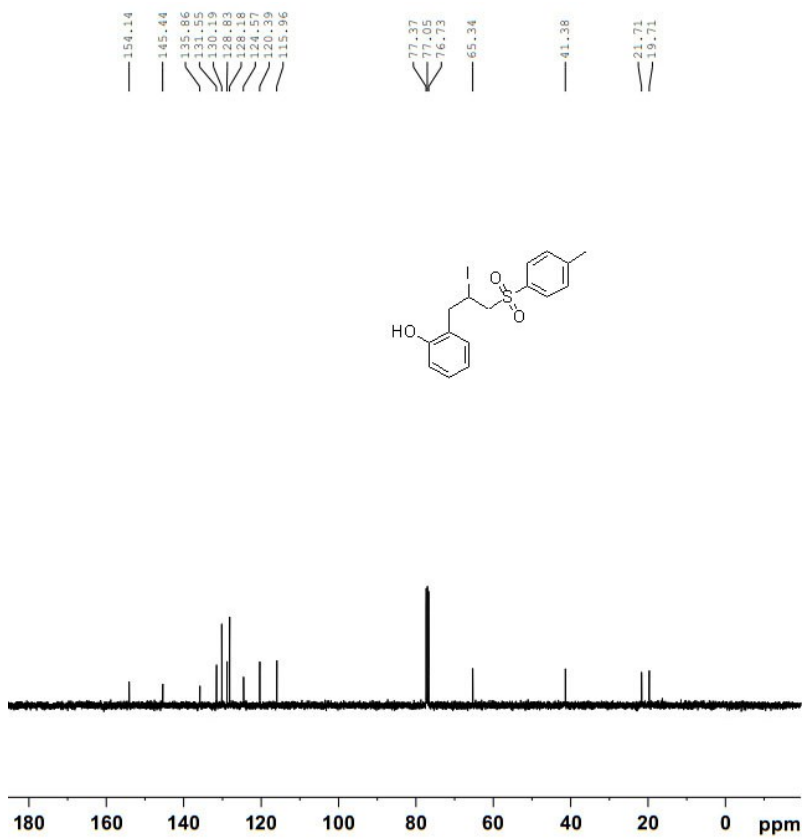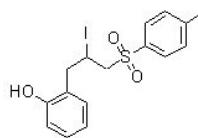

# Compound 3p

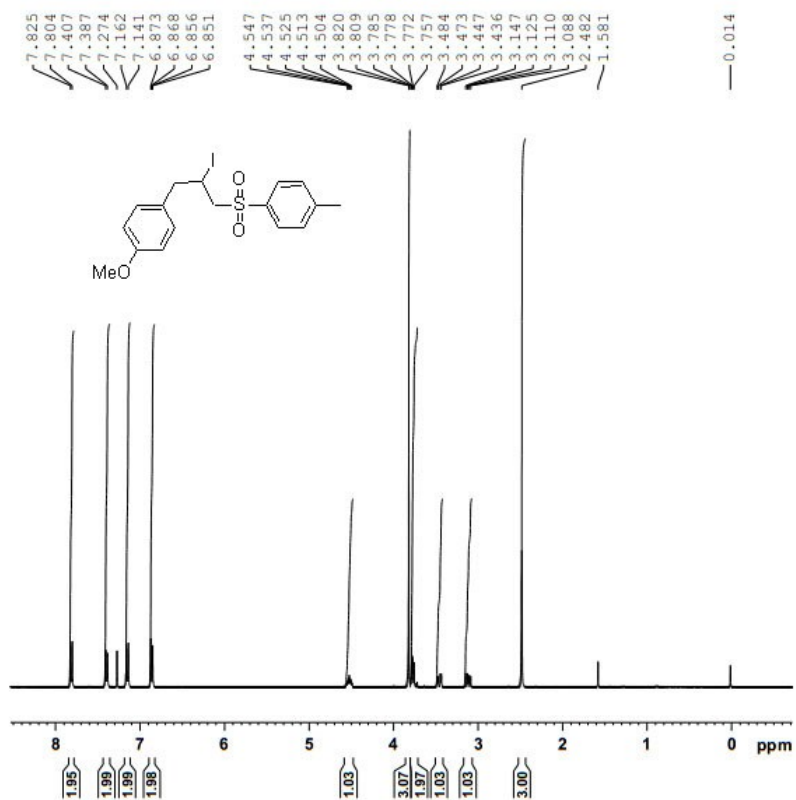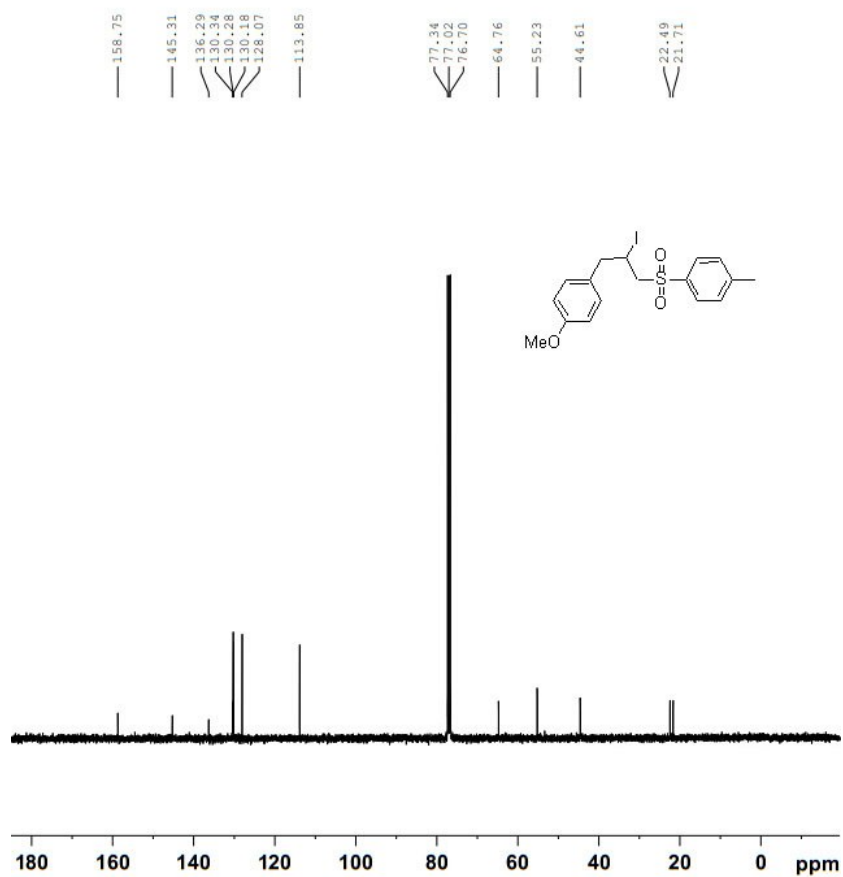



# Compound 3q

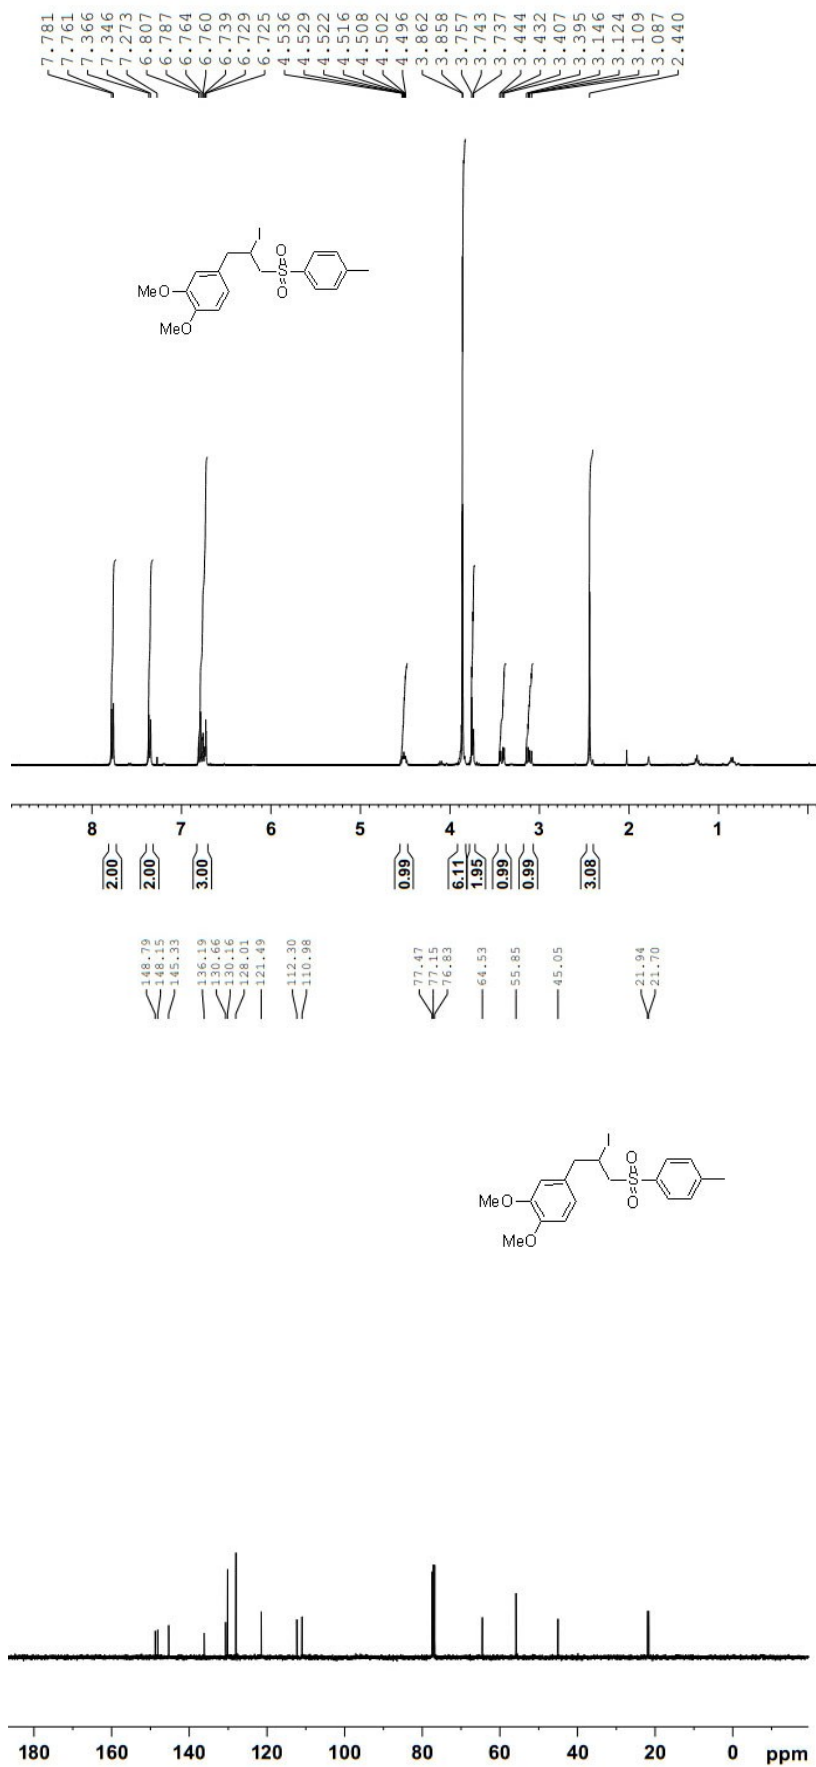

Compound 6a

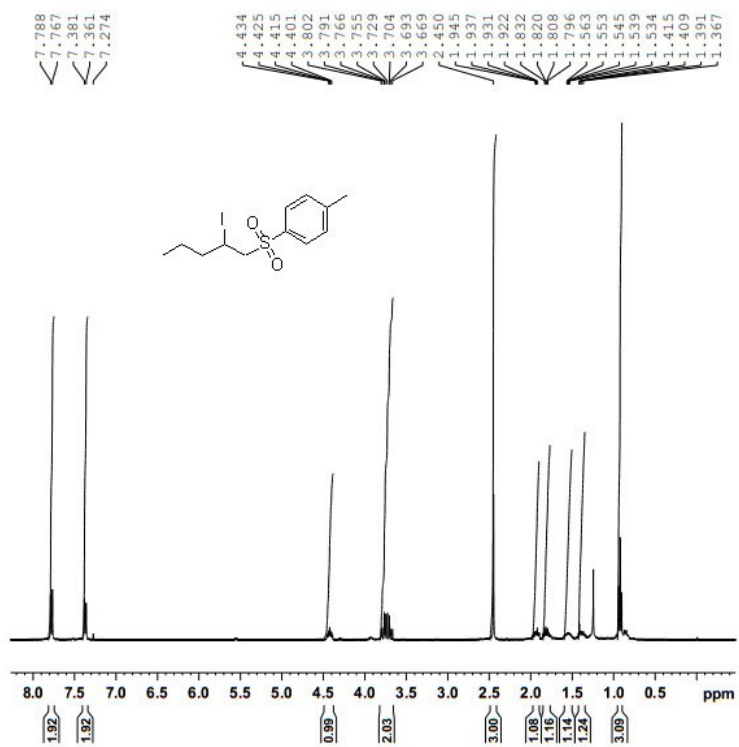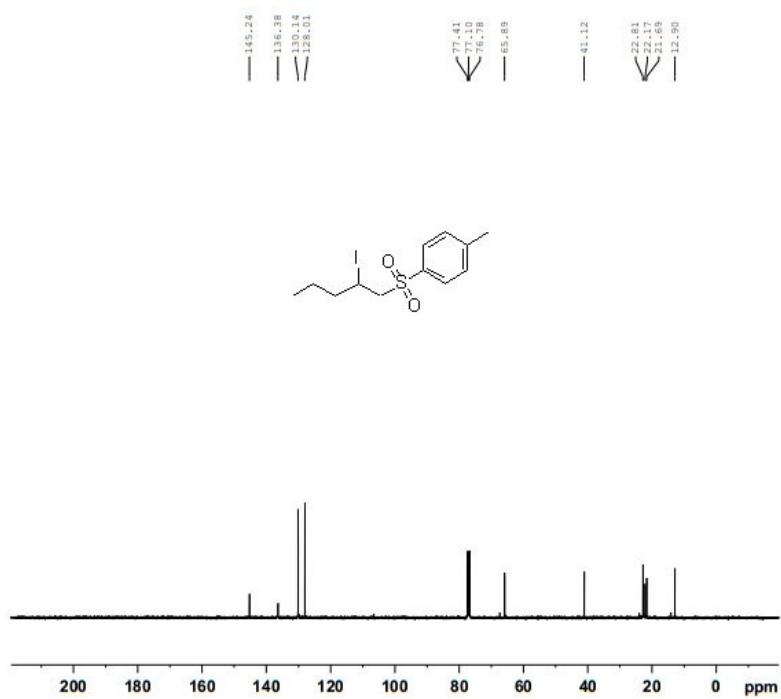

Compound 6b

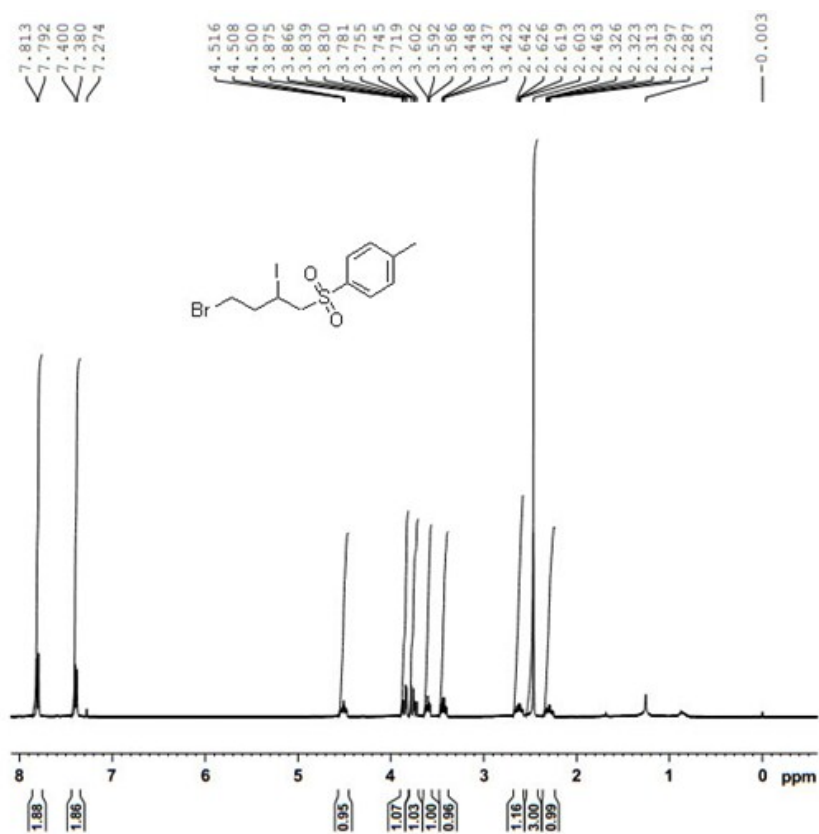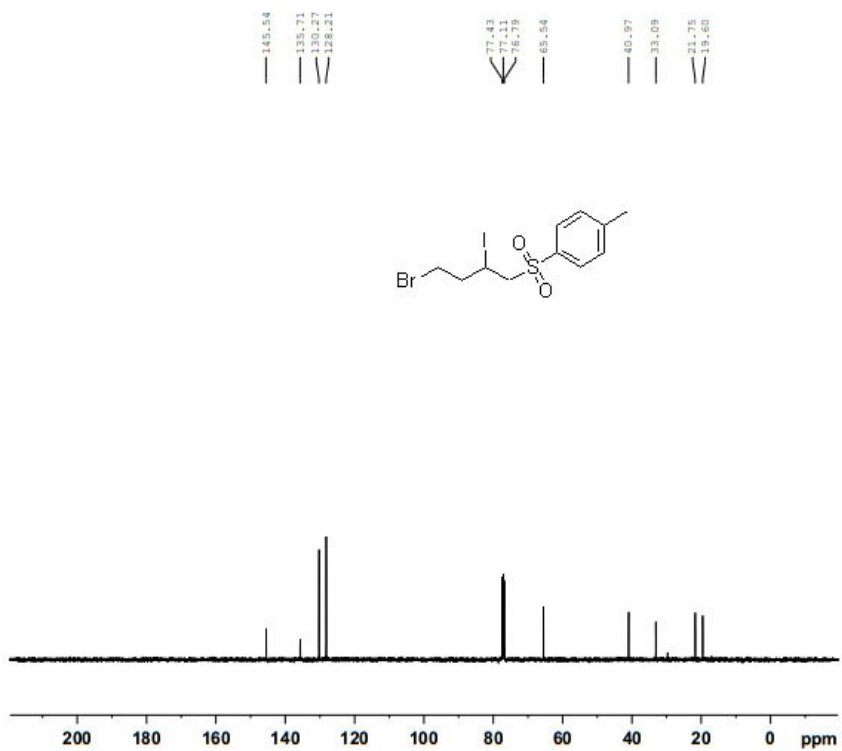

Compound 6c

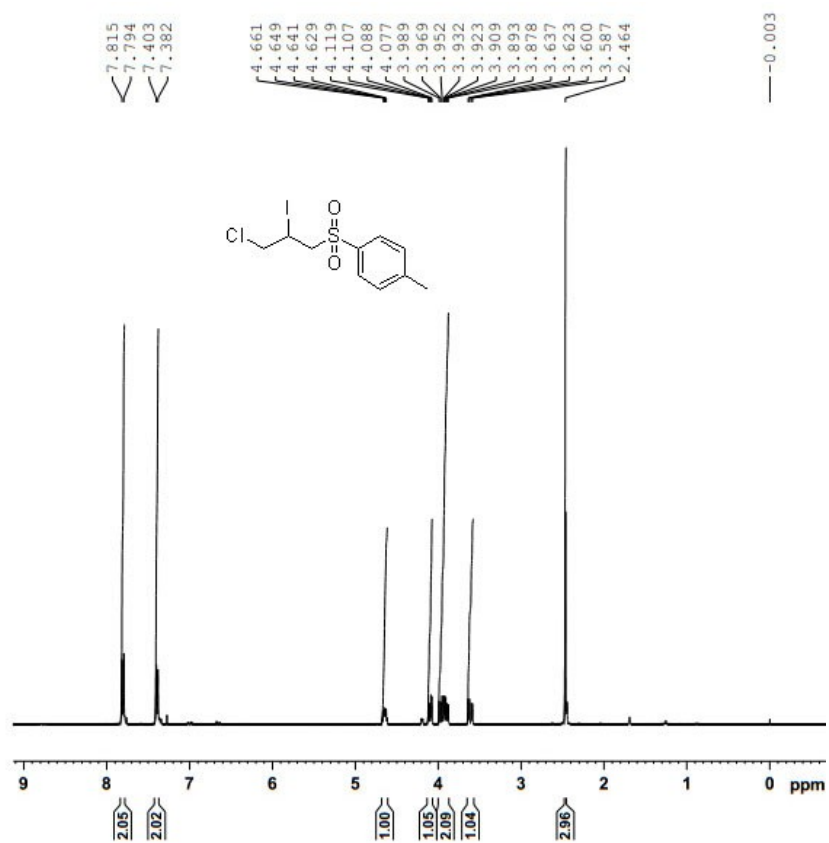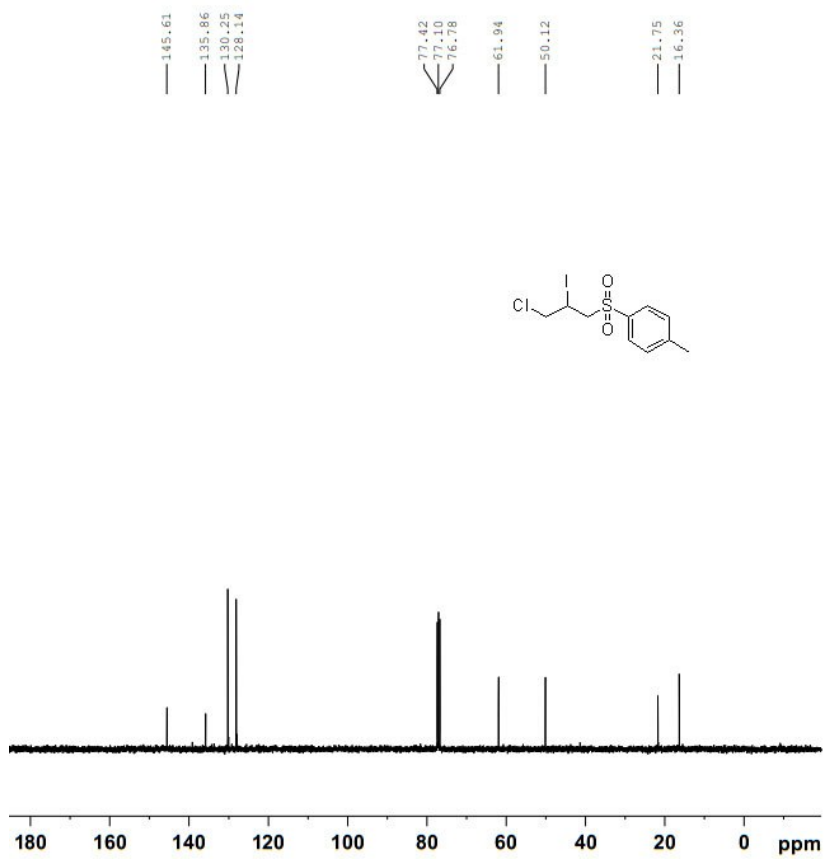

# Compound 6d

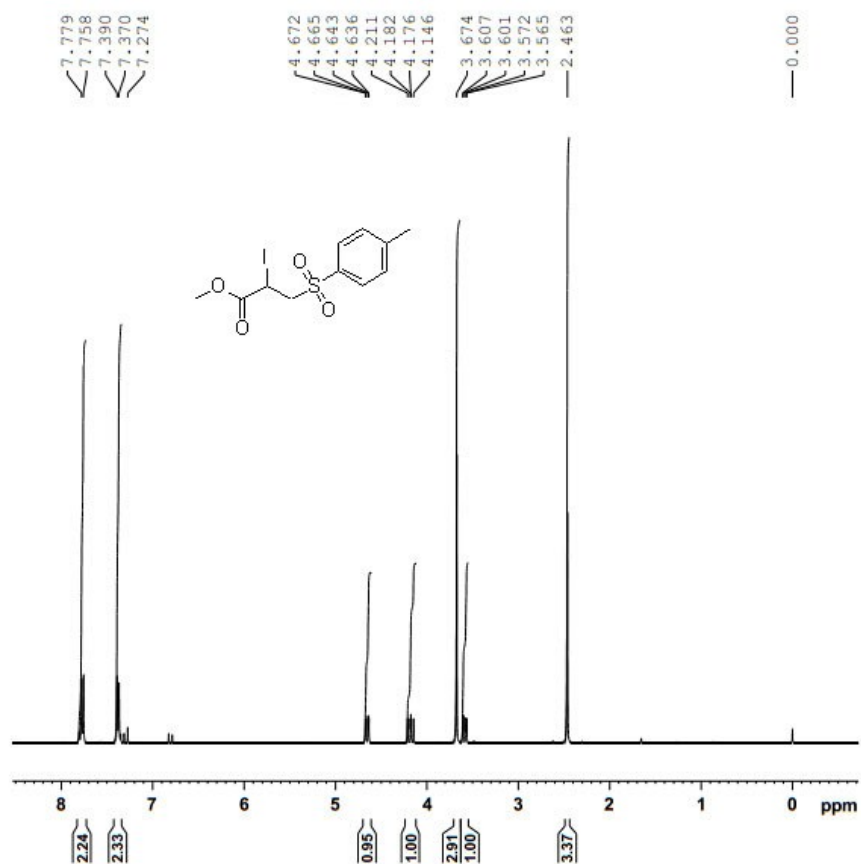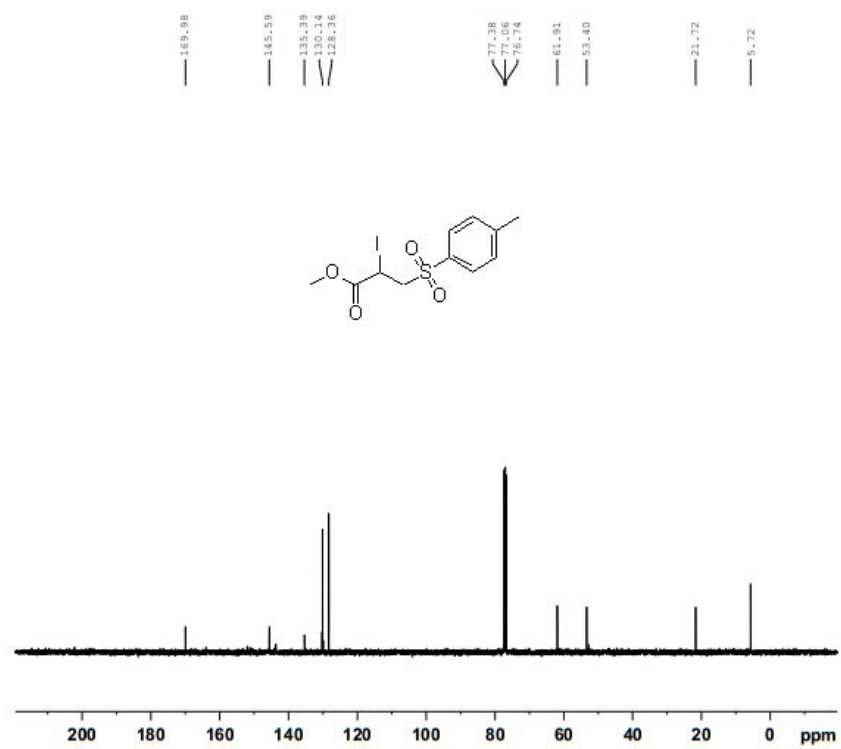

Compound 6e

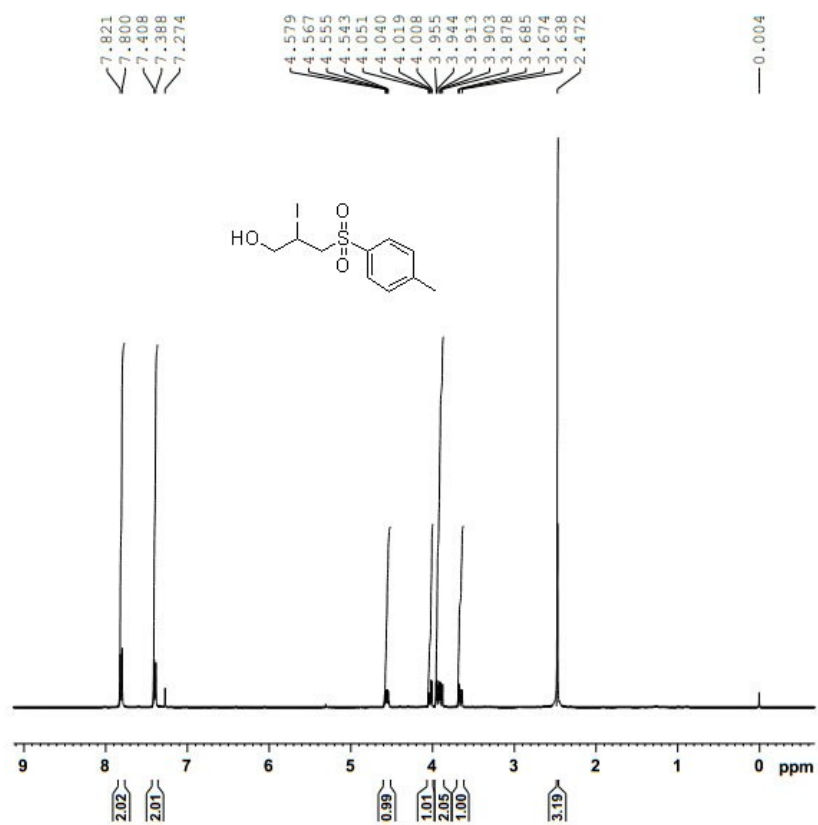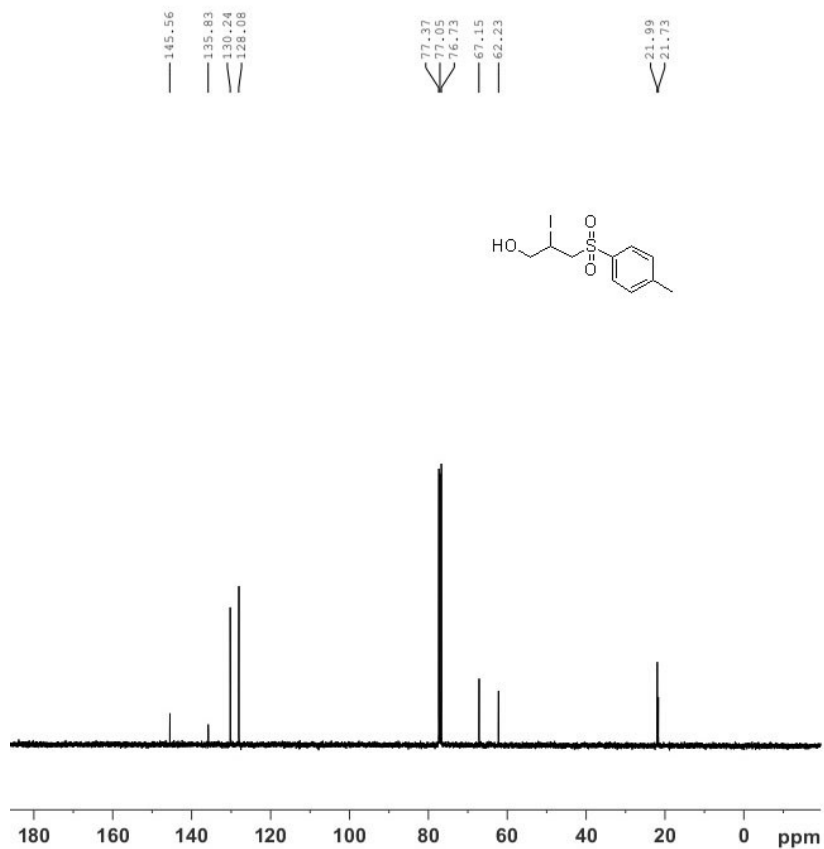

# Compound 6f

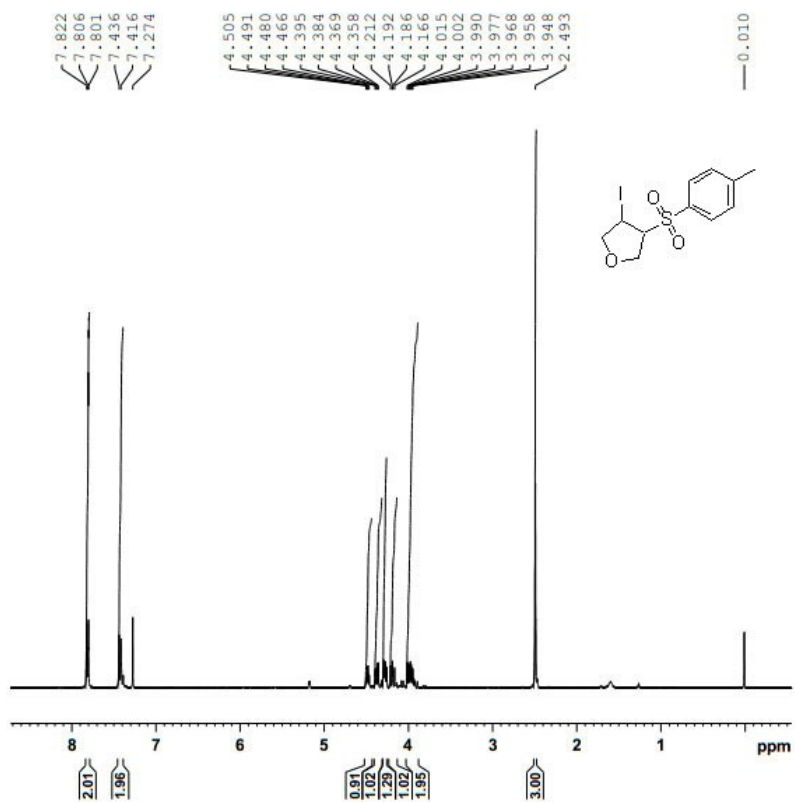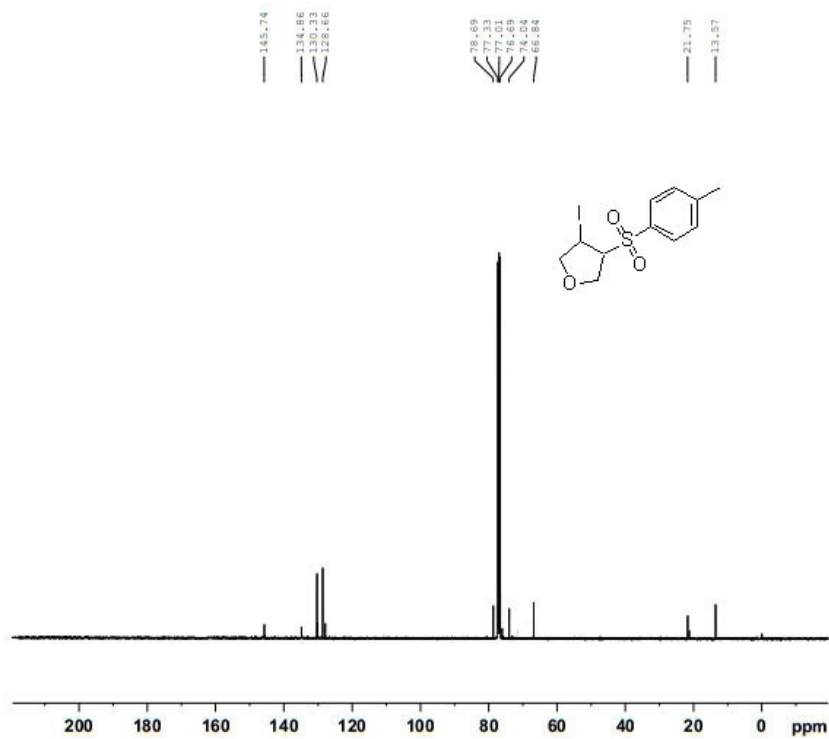

Supplement: c5ra07065a1.pdf [file c5ra07065a1.pdf]
